1

1 **Title: Uncovering active modulators of native macroautophagy through novel**  
2 **high-content screens**

3  
4 Author list: Safren N<sup>1</sup>, Tank EM<sup>1</sup>, Santoro N<sup>2</sup>, and Barmada SJ<sup>1\*</sup>

5  
6 Affiliations: <sup>1</sup>University of Michigan, Department of Neurology, Ann Arbor MI, <sup>2</sup>University  
7 of Michigan, Center for Chemical Genomics, Life Sciences Institute

8  
9 \*Correspondence addressed to: sbarmada@umich.edu

10  
11  
12 **Abstract**

13 Autophagy is an evolutionarily conserved pathway mediating the breakdown of cellular  
14 proteins and organelles. Emphasizing its pivotal nature, autophagy dysfunction  
15 contributes to many diseases; nevertheless, development of effective autophagy  
16 modulating drugs is hampered by fundamental deficiencies in available methods for  
17 measuring autophagic activity, or flux. To overcome these limitations, we introduced the  
18 photoconvertible protein Dendra2 into the *MAP1LC3B* locus of human cells via  
19 CRISPR/Cas9 genome editing, enabling accurate and sensitive assessments of  
20 autophagy in living cells by optical pulse labeling. High-content screening of 1,500 tool  
21 compounds provided construct validity for the assay and uncovered many new  
22 autophagy modulators. In an expanded screen of 24,000 diverse compounds, we  
23 identified additional hits with profound effects on autophagy. Further, the autophagy  
24 activator NVP-BEZ235 exhibited significant neuroprotective properties in a  
25 neurodegenerative disease model. These studies confirm the utility of the Dendra2-LC3  
26 assay, while simultaneously highlighting new autophagy-modulating compounds that  
27 display promising therapeutic effects.

28  
29 **Introduction**

30 Macroautophagy (hereafter referred to as autophagy) is an essential pathway for  
31 protein homeostasis whereby cytoplasmic proteins and organelles are delivered to  
32 lysosomes for degradation<sup>1</sup>. Through the coordinated action of a series of autophagy-  
33 related (ATG) proteins and cargo receptors including p62/SQSTM1, NBR1, and  
34 optineurin<sup>2</sup>, substrates are sequestered within double membrane vesicles called  
35 autophagosomes. Autophagosomes mature as they traffic along microtubules and  
36 eventually fuse with lysosomes to form autolysosomes, wherein hydrolases degrade  
37 autophagic cargo. The protein LC3 (ATG8) is an obligate component of autophagosome  
38 membranes and is itself degraded within autolysosomes. For these reasons, it often

39 serves as both a marker of autophagosomes and as a representative autophagy  
40 substrate<sup>3</sup>.

41 Underscoring the critical requirement of autophagy in cellular homeostasis,  
42 deletion of core autophagy genes in mice results in embryonic lethality<sup>4,5,6</sup>. Accordingly,  
43 dysfunctional autophagy is linked to a wide spectrum of human disease including  
44 neurodegeneration, cancer, metabolic disorders, infectious and cardiovascular  
45 diseases<sup>7</sup>. Often these conditions involve deficiencies in one or more steps of  
46 autophagy, resulting in impaired clearance of potentially toxic cellular components,  
47 and/or a failure to replenish amino acids required for anabolic processes. In these  
48 instances, enhancing the rate of autophagic cargo clearance, commonly referred to as  
49 flux, would be beneficial. Conversely, autophagy can promote tumor progression and  
50 resistance to chemotherapy for some cancers<sup>8,9,10,11</sup>. Here, autophagy inhibition may  
51 represent a more apt therapeutic strategy<sup>7</sup>.

52 Autophagy is of particular importance in the central nervous system (CNS).  
53 Deletion of essential autophagy genes within the CNS of mice leads to progressive  
54 neurodegeneration marked by accumulation of protein aggregates<sup>12,13,14,15,16</sup>. Defective  
55 autophagy is a common feature of many neurodegenerative diseases including  
56 Alzheimer's disease<sup>17,18</sup>, Parkinson's disease<sup>19,20,21,22,23</sup>, polyglutamine disorders<sup>24,25,26</sup>,  
57 amyotrophic lateral sclerosis (ALS)<sup>27</sup> and frontotemporal dementia (FTD)<sup>28,29,30,31</sup>.  
58 Moreover, mutations in several autophagy related proteins including p62/SQSTM1<sup>32</sup>,  
59 optineurin<sup>33</sup>, C9ORF72<sup>34,35</sup>, TBK1<sup>36</sup>, and UBQLN2<sup>37</sup> results in familial ALS and FTD.

60 Due to its broad therapeutic potential, autophagy modulation has received  
61 considerable attention as a target for drug development<sup>7</sup>. Nevertheless, these efforts  
62 have thus far failed to translate into effective therapies for patients. This is in part due to  
63 the intrinsic difficulties in measuring autophagic flux, and consequent inability of many  
64 conventional and widely used autophagy assays to accurately estimate flux<sup>3</sup>. One  
65 prominent limitation of these assays is an implicit reliance on the steady-state  
66 abundance of pathway intermediates such as LC3-II, the lipidated isoform of LC3. Due  
67 to the dynamic nature of autophagy, changes in such intermediates may equally reflect  
68 increased autophagy induction or late-stage inhibition of autophagosome clearance;  
69 although discriminating among these mechanisms is crucial for drug development, many  
70 assays are effectively unable to do so. While lysosomal inhibitors such as bafilomycin-  
71 A1 can be used to isolate autophagy induction from inhibition, this approach obscures  
72 estimates of substrate clearance, perhaps the most relevant measure of autophagic flux.

73 Bafilomycin-A1 and related compounds are also inherently toxic, further confounding flux  
74 measurements<sup>38,39</sup>. Yet another common shortcoming is an inherent reliance on static  
75 “snapshots” of separate cellular populations that cannot be followed prospectively or  
76 longitudinally due to the need for cell lysis and measurement of pathway intermediates.

77 We previously developed a technique called optical pulse labeling (OPL),  
78 enabling non-invasive measurements of autophagic flux in living cells without the need  
79 for lysosomal inhibition<sup>40</sup>. In this technique, LC3 is labeled with the photoconvertible  
80 protein Dendra2<sup>41</sup>. Upon exposure to blue (405nm) light, Dendra2 fluorescence  
81 irreversibly shifts from green to red. Since the generation of red-fluorescent Dendra2-  
82 LC3 is limited by blue light, LC3 turnover can be determined independent of new protein  
83 synthesis by tracking the time-dependent reduction in red fluorescence following a brief  
84 pulse of blue light (Fig. 1A). LC3 is an autophagy substrate, and therefore its  
85 degradation kinetics serves as a faithful proxy for estimates of autophagic flux. While  
86 OPL offered several advantages over conventional assays, it was nonetheless limited by  
87 its reliance on protein overexpression; in effect, Dendra2-LC3 overexpression floods the  
88 pathway under investigation with an obligate substrate. Burdening the cell with non-  
89 physiological concentrations of substrate might artificially prolong flux estimates, or  
90 conversely enhance flux via regulatory feedback mechanisms. Moreover, because  
91 autophagy regulation is intricately tied to amino acid availability<sup>42,43</sup> and the ubiquitin  
92 proteasome system<sup>44</sup>, any perturbations to these pathways brought on by protein  
93 overexpression may further confound measurements of flux.

94 To overcome these drawbacks, we labeled *native* LC3 with Dendra2 using  
95 CRISPR/Cas9 editing, producing a novel autophagy reporter cell line capable of  
96 assaying flux in living cells without the need for drug treatment, protein overexpression  
97 or measurements of pathway intermediates, thus establishing a faithful reporter of  
98 endogenous autophagy activity unadulterated by exogenous manipulations. Leveraging  
99 this cell line for its unique perspective on autophagy and the opportunities it presents, we  
100 adapted Dendra2-LC3 cells for conducting high-content screens and identified several  
101 new and active autophagy modulators with promising therapeutic properties.

102

## 103 **Results**

### 104 **Creation of a novel reporter of autophagic flux**

105 We employed CRISPR/Cas9 genome editing to label native LC3 by introducing  
106 Dendra2 into the *MAP1LC3B* locus (encoding LC3) of human embryonic kidney (HEK)

107 cells<sup>45</sup> (Fig. 1B). To minimize the risk of undesired insertions/deletions via non-  
108 homologous end-joining we used a dual-nickase strategy<sup>46</sup>, in which Cas9(D10A) was  
109 expressed along with two single-guide RNAs (sgRNAs) targeting sequences  
110 immediately upstream and downstream of the *MAP1LC3B* start codon. Unlike wild-type  
111 Cas9, Cas9(D10A) induces single-stranded nicks rather than double-stranded breaks in  
112 the DNA, limiting recombination to the region marked by the sgRNAs. In addition, a  
113 vector containing the Dendra2 open reading frame (ORF) flanked by 400bp of  
114 homologous sequence 5' and 3' to the *MAP1LC3B* start codon was introduced to  
115 facilitate homology directed repair (HDR), thereby creating a sequence encoding  
116 Dendra2 fused to the N-terminus of LC3. Positive cells were selected based on Dendra2  
117 fluorescence and enriched by sequential passaging until a homogenous population was  
118 achieved. Western blotting confirmed the successful insertion of the Dendra2 ORF into  
119 the desired locus (Fig. 1C). Transfection with siRNA targeting LC3 substantially reduced  
120 both Dendra-LC3 protein levels and native GFP fluorescence, providing further  
121 validation of successful on-target CRISPR editing (Fig. 1C,D).

122 In untreated cells, Dendra2-LC3 fluorescence was diffusely distributed, matching  
123 the predicted localization of the non-lipidated, cytosolic LC3-I isoform (Fig. 1E,  
124 Supplemental movie 1). Treatment with the potent autophagy inducer Torin1<sup>47</sup> elicited  
125 the formation of visible fluorescent puncta and reduced the intensity of diffuse Dendra2-  
126 LC3 (Fig. 1E, Supplemental movie 2), reflecting the incorporation of Dendra2-LC3 into  
127 autophagosome membranes. In agreement with previous studies of autophagosome  
128 dynamics<sup>26,48</sup>, live cell imaging revealed that a subset of Dendra2-LC3 puncta were  
129 highly mobile (Supplemental movie 2). As expected, inhibiting the clearance of  
130 autophagosomes via treatment with the lysosomal V-ATPase inhibitor bafilomycin-A1  
131 lead to the accumulation of large bright puncta without an accompanying decrease in  
132 diffuse Dendra2-LC3 fluorescence (Supplemental movie 3). Together these data confirm  
133 that Dendra2-tagged version of LC3 behaves as expected in modified HEK293T cells<sup>40</sup>,  
134 and that these cells can be used to visualize autophagy modulation by a variety of  
135 stimuli.

136

### 137 **Development and validation of an autophagic flux assay**

138 In these cells, endogenous Dendra2-LC3 could be efficiently photoconverted with  
139 minimal toxicity using 4s pulses of 405nm light, producing a strong red signal (Fig. 2A)  
140 concurrent with a substantial reduction in green fluorescence. Using time-lapsed

141 microscopy, we measured fluorescence intensity in both the red (TRITC) and green  
142 (GFP) channels at regular intervals over the span of 13.5h. In vehicle-treated cells red  
143 fluorescence decayed with a half-life of approximately 7.5h. Treatment with Torin1  
144 significantly accelerated this decay, reducing Dendra2-LC3 half-life ~3-fold to 2.5h. In  
145 contrast, bafilomycin-A1 completely stabilized Dendra2-LC3 and blocked the Torin1-  
146 induced reduction in Dendra2-LC3 half-life (Fig. 2A, B). Thus, endogenous Dendra2-LC3  
147 flux measured by OPL responds appropriately to bidirectional modulation of autophagy.

148 To confirm autophagy-dependent degradation of Dendra2-LC3 in modified HEK  
149 cells, we asked whether genetic inhibition of autophagy extended Dendra-LC3 half-life.  
150 HEK cells were transfected with siRNA targeting the autophagy gene ATG5<sup>49</sup>, achieving  
151 a marked reduction in ATG5 levels (Fig. S1). ATG5 knockdown attenuated Torin1's  
152 effects on Dendra2-LC3 half-life but had no discernible impact on Dendra2-LC3 turnover  
153 in vehicle treated cells (Fig. 2C). These data show that Dendra2-LC3 clearance in  
154 response to Torin1 is mediated by autophagy, and also suggest that ATG5 expression  
155 levels may be rate limiting only upon autophagy induction.

156 Consistent with effective photoconversion of Dendra2-LC3, GFP intensity  
157 dropped by approximately 40% in pulsed cells, returning to pre-conversion levels within  
158 13h (Fig. 2D). This return to steady-state GFP intensity likely reflects an equilibrium point  
159 at which new Dendra-LC3 production is balanced with its turnover. Treatment with  
160 Torin1 shifted this balance, not only preventing the return in GFP signal, but also further  
161 reducing GFP intensity over time. Application of bafilomycin-A1 (Fig. 2D) or ATG5  
162 knockdown (Fig. 2E) both prevented Torin1-induced reductions in Dendra2-LC3 GFP  
163 intensity. Conversely, bafilomycin-A1 treatment led to a supra-physiological increase in  
164 GFP signal (Fig. 2D). Thus, while the decay of photoconverted (red) Dendra2-LC3 can  
165 be used to accurately measure autophagic flux because it decouples protein turnover  
166 and synthesis, time-dependent changes in native (green) Dendra2-LC3 fluorescence  
167 mirror those observed in the red channel, and provide complementary estimates of flux.

168 To confirm that the metabolism of endogenous Dendra2-LC3 reflects autophagic  
169 flux, while simultaneously validating the use Dendra2-LC3 cells for identifying new  
170 autophagy-modulating strategies, we used the cells to screen an Enzo tool compound  
171 library that includes several drugs with purported effects on autophagy (Fig. 3A, Figure  
172 3-source data). These experiments helped gauge the generalizability of the assay  
173 beyond the effects of strong autophagy modulators such as Torin1 and bafilomycin-A1,

174 and also helped determine its ability to identify drugs that impact autophagy through a  
175 variety of mechanisms.

176 Cells were imaged once prior to photoconversion to measure background RFP  
177 intensity. As in previous experiments, a 4s pulse of 405nm light was used for  
178 photoconversion. Imaging occurred again immediately following photoconversion to  
179 determine the maximum RFP signal. All subsequent RFP intensities were normalized to  
180 this value after subtraction of the measured background RFP signal. Library drugs were  
181 added at 10 $\mu$ M via a robotic liquid handler, cells were imaged every 1.5h for 16h, and  
182 time-dependent changes in RFP intensity were measured for each condition. Using  
183 DMSO and Torin1 as negative and positive controls, respectively, we observed a  $Z'$ =.79  
184 at 9h after drug application, demonstrating high sensitivity and reproducibility of the  
185 assay.

186 Many canonical autophagy-modulating drugs demonstrated clear effects on  
187 autophagic flux (Fig. 3A), establishing construct validity for the assay. Among  
188 compounds that significantly enhanced autophagic flux were the allosteric mTOR  
189 inhibitor rapamycin and the dual PI3K/mTOR inhibitors NVP-BEZ235 and PI-103. Torin1  
190 and PI-103 exerted particularly strong effects in line with their action as ATP competitive  
191 antagonists<sup>47,50</sup>. 10-NCP, an AKT inhibitor that we previously identified as a neuronal  
192 autophagy-inducing compound<sup>40,51</sup>, also increased autophagic flux in Dendra2-LC3 HEK  
193 cells. Rottlerin, a compound that demonstrated autophagy-enhancing effects via  
194 inhibition of mTOR as well as protein kinase C (PKC) delta, greatly accelerated the  
195 degradation of Dendra2-LC3<sup>52,53</sup>.

196 Bafilomycin-A1, also present in the compound library, registered as a strong  
197 inhibitor of Dendra2-LC3 flux (Fig. 3A), providing internal consistency with regards to our  
198 initial investigations. Rather than decrease over time, the intensity of photoconverted  
199 (red) Dendra2-LC3 in cells treated with bafilomycin-A1 progressively increased,  
200 eventually exceeding levels immediately following photoconversion (Fig. 3B). This  
201 phenomenon reflects a peculiar imaging property unique to Dendra2-linked proteins that  
202 accumulate within large puncta, in the process sequestering diffuse, low-intensity signal  
203 within relatively small regions (Fig. S2). Thus, the time-dependent degradation Dendra2-  
204 LC3 is inhibited by bafilomycin-A1, and the observed increase in red fluorescence  
205 intensity is due to the accumulation of Dendra2-LC3 within large clusters of perinuclear  
206 autophagosomes.

207           The protein translation inhibitor cyclohexamide stabilized Dendra2-LC3 turnover  
208 (Fig. 3A,B), in keeping with autophagy inhibition downstream of amino acid accumulation  
209 and mTORC1 activation<sup>54</sup>. This is in contrast to what is observed in the green channel,  
210 where inhibiting the synthesis of Dendra2-LC3 results in a decrease in GFP  
211 fluorescence as expected (Fig. 5-source data). These results highlight the pivotal ability  
212 of the assay to decouple autophagy inhibition from new protein synthesis.

213           Dendra2-LC3 RFP fluorescence was also stabilized by the proteasome inhibitor  
214 MG132 and the protease/proteasome inhibitor ALLN (Fig. 3A; Fig. 3-source data), albeit  
215 to a far lesser degree than with bafilomycin-A1 or other strong inhibitors. This suggests  
216 that while Dendra2-LC3 serves as valid reporter of autophagic flux, it is not degraded  
217 exclusively via autophagy. Therefore, to confirm that hits arising from this assay were  
218 indeed capable of affecting Dendra2-LC3 turnover via their actions on autophagy, we  
219 tested their effects in ATG5-deficient cells. As seen with Torin1 (Fig. 2), ATG5  
220 knockdown attenuated the autophagy-inducing effects of NVP-BEZ235 and rapamycin  
221 (Fig. 3C,D), verifying that these drugs stimulate Dendra2-LC3 clearance by enhancing  
222 autophagic flux.

223           Because of the nature of the screen, compounds exhibiting intrinsic fluorescence  
224 could result in an artificially high RFP signal, leading to their subsequent  
225 misclassification as autophagy inhibitors. To address this possibility we rescreened all  
226 hits in unmodified HEK293 cells that do not express Dendra2. We found that 4 out of the  
227 35 tested drugs, including 3 out of the 10 drugs that were identified as inhibitors,  
228 exhibited intrinsic fluorescence in the RFP channel (Fig. 3-source data, Fig. S3). For  
229 instance, curcumin, a purported autophagy modulator<sup>55</sup> with known autofluorescent  
230 properties<sup>56</sup> produced a substantial increase in background RFP signal that precluded  
231 any estimations of its effects on autophagy in this assay. In contrast, the PKC inhibitor  
232 bim-1 had little effect on background fluorescence, but instead accumulated within  
233 perinuclear autofluorescent puncta that resembled those observed in cells treated with  
234 bafilomycin-A1. These results underscore the importance of counter-screening to  
235 exclude intrinsically fluorescent drug properties that can confound or obscure results.

236

### 237 **Establishing a high-content screening platform for autophagy modulators**

238           Using Torin1 and bafilomycin-A1, we next evaluated the sensitivity of Dendra2-  
239 LC3 cells for detecting small changes in autophagic flux in a dose-dependent manner.  
240 We tested the effects of 10 serial dilutions of each drug in both the GFP and RFP

241 channels. As in previous experiments, baseline GFP and background RFP  
242 measurements were acquired prior to photoconversion. GFP measurements were  
243 normalized to this baseline value while RFP was normalized to the background-  
244 subtracted postconversion intensity. Following drug treatment, we imaged every 30m for  
245 13.5h and analyzed time- and concentration-dependent effects in each channel. We  
246 observed a tunable and proportional response to increasing drug concentrations for both  
247 Torin1 and bafilomycin-A1 (Fig. 4A). This was perhaps most evident for bafilomycin-A1,  
248 where the assay had sufficient resolution to discriminate 2nM changes in concentration  
249 (Fig. 4C, E). Notably, the GFP channel was nearly as sensitive as the RFP channel for  
250 detecting differences in autophagic flux (Fig. 4D, E). While the GFP fluorescence  
251 gradually returned to equilibrium in vehicle treated cells over a 12h span, it continued to  
252 drop with Torin1 treatment in a dose-dependent manner (Fig. 4D). Conversely, the GFP  
253 intensity quickly surpassed pre-photoconversion levels in cells treated with bafilomycin-  
254 A1, and the rate of increase was proportional to the drug dose (Fig. 4E). For Torin1,  
255 bafilomycin-A1, rapamycin and NVP-BE2235, the dose response relationships for each  
256 drug were strikingly similar between channels, producing nearly identical half maximal  
257 effective concentration (EC50) and half maximal inhibitory concentration (IC50) values  
258 for each compound (Fig. 4F).

259 These data indicate that both the GFP and RFP channels provide accurate  
260 information regarding autophagic flux upon drug addition. Since imaging in the GFP  
261 channel does not require photoconversion, experiments take only a fraction of the time  
262 that would otherwise be needed to track Dendra-LC3 turnover in the RFP channel. We  
263 took advantage of this fact in developing a high-throughput and high-content screening  
264 platform in Dendra2-LC3 HEK cells. Cells were imaged in the GFP channel immediately  
265 prior to drug addition ( $GFP_{0H}$ ) and then again 15h later ( $GFP_{15H}$ ). Autophagy enhancers  
266 were defined as those drugs that reduce the  $GFP_{15H}/GFP_{0H}$  ratio by more than 3  
267 standard deviations from the mean of vehicle (DMSO), and inhibitors as drugs that  
268 increase the  $GFP_{15H}/GFP_{0H}$  ratio by more than 3 standard deviations. In 3 replicate 90/10  
269 studies where 90% of wells were treated with DMSO and 10% were treated with Torin1,  
270 we observed a 1% false positive rate, no false negatives, and a mean  $Z'=.52$ , thus  
271 validating this method as a reliable primary screening assay (Fig. 5A, Table 1).

272



273 **TABLE 1:** 90/10 experiments evaluating primary high-throughput screening assay.

|                       | Experiment 1(n=96) | Experiment 2 | Experiment 3 |
|-----------------------|--------------------|--------------|--------------|
| Z'                    | 0.51               | 0.49         | 0.56         |
| false positives       | 1                  | 3            | 4            |
| false negatives       | 0                  | 0            | 0            |
| mean DMSO-mean Torin1 | 0.75               | 1.46         | 1.14         |
| DMSO SD/DMSO mean     | 6.40%              | 11%          | 9%           |

274

275

276 We then devised a layered screening scheme where hits from the primary assay  
277 were filtered based on toxicity, then subjected to a counter-screen where Dendra2-LC3  
278 half-life is determined following photoconversion and imaging in the red channel. This  
279 organization combines the added throughput of imaging in the green channel with the  
280 ability to selectively monitor Dendra2-LC3 degradation in the red channel. Custom  
281 scripts were used to exclude toxic compounds based on their effects on cell number—  
282 this was particularly important since drugs that cause cells to die might significantly  
283 lower GFP intensity and could therefore be misconstrued as false-positives.

284 We first applied this screening strategy to the Prestwick drug library, a collection  
285 of 1,280 off-patent small molecules, 95% of which have gained regulatory approval by  
286 the FDA, EMA and other agencies. Eighteen compounds were filtered out due to toxicity;  
287 17 of which would have otherwise been identified as autophagy enhancers due to their  
288 ability to significantly reduce GFP intensity. Among the remaining compounds, 129  
289 exhibited significant effects on Dendra2-LC3 levels, with 88 significantly reducing the  
290 GFP<sub>15H</sub>/GFP<sub>0H</sub> ratio (i.e. enhancing autophagy) and 41 increasing the ratio (i.e. inhibiting  
291 autophagy) (Fig. 5B, Fig. 5-source data).

292 We also assessed the frequency of Dendra2-LC3 puncta—corresponding to  
293 autophagosomes—in treated cells, since a change in the number or size of puncta could  
294 indicate either autophagy induction or late-stage autophagy inhibition<sup>3</sup>. In fact, 2 previous  
295 high-throughput screens utilized changes in LC3 puncta number to identify autophagy  
296 modulators<sup>57,58</sup>. In native Dendra2-LC3 cells, we observed an increase in Dendra2-LC3  
297 puncta number in response to 38 drugs, but only 13 of these compounds significantly  
298 affected autophagic flux in the primary screen. Among these 13, 11 reduced the  
299 GFP<sub>15H</sub>/GFP<sub>0H</sub> ratio and were counted as enhancers, while 2 compounds acted as  
300 inhibitors and increased the GFP<sub>15H</sub>/GFP<sub>0H</sub> ratio (Fig. 5B, Fig. 5-source data).

301 All 129 hits, along with 2 drugs that narrowly missed significance in the primary  
302 assay, were then evaluated for their ability to affect the degradation of photoconverted  
303 Dendra2-LC3. 17 compounds (13%) significantly modulated autophagic flux; of these, 11  
304 enhanced flux and 6 inhibited it. Counter-screening in unmodified HEK cells uncovered  
305 two drugs, diacerein and mitoxantrone, with intrinsic red fluorescence independent of  
306 their effects on autophagy Fig. 5-source data, Fig. S3).

307 Among notable enhancers were the antiarrhythmic drugs digoxigenin, a  
308 metabolite of digoxin, and clofilium tosylate. Ciclopirox olamine, an off-patent anti-fungal  
309 agent found in both the Prestwick and Enzo libraries, potently enhanced autophagy.

310 Similarly, the anthelmintic niclosamide inhibited autophagy to a comparable extent as  
311 bafilomycin-A1 in the Enzo compound screen, and was the strongest inhibitor tested in  
312 the Prestwick library, demonstrating significant consistency of the assay across different  
313 libraries. As seen previously, cyclohexamide modestly stabilized photoconverted (red)  
314 Dendra2-LC3, despite lowering green Dendra2-LC3 levels in the primary screen. This  
315 ability to exclude compounds that lower LC3 levels due to translation inhibition  
316 demonstrates the value of screening in both the GFP and RFP channels. These data,  
317 along with the observation that 87% of primary screen “enhancers” failed to stimulate  
318 autophagy in counter-screening, suggest that the primary screen is a sensitive but not  
319 specific method to identify autophagy enhancers, but the added selectivity of the  
320 secondary screen provides a means to successfully filter out false enhancers.

321

### 322 **An expanded screen identifies novel autophagy inhibitors**

323 Our data indicate that Dendra2-LC3 cells provide a robust, accurate and precise  
324 measure of autophagic flux that can be readily adapted for compound screening. To  
325 identify new autophagy modulating drugs, we took advantage of the screening assay we  
326 developed to investigate a library of 24,000 drugs spanning considerable chemical  
327 diversity curated from the Maybridge library. In our screen of the Prestwick library a large  
328 percentage of hits from the primary screen (time-dependent changes in the GFP  
329 intensity) failed to show an effect in the secondary assay (time-dependent changes in  
330 RFP intensity post-photoconversion). Since we aimed to test ~20 times as many  
331 compounds as before, we chose to filter out false positives by repeating the primary  
332 assay and retesting hits after exclusion of toxic compounds, before progressing to  
333 secondary screening involving clearance of photoconverted Dendra2-LC3. We also  
334 confirmed each hit by repeating the secondary screen prior to further filtering based on  
335 the solubility and permeability of each hit. Finally, the intrinsic fluorescence of each  
336 candidate compound was assessed in unmodified HEK239T cells, and all remaining hits  
337 were confirmed using orthogonal flux assays (Fig. 6A).

338 Similar to the 10% hit rate observed with the Prestwick library, we identified 2160  
339 compounds (9%) as potential autophagy modulators from the primary screen. Of these,  
340 1958 registered as autophagy enhancers, and 202 as inhibitors. Upon repeating the  
341 screen after excluding toxic compounds, 232 candidates (1%) remained as hits,  
342 underscoring the need to repeat the primary screen. The retest reduced the number of  
343 enhancers more than 10-fold while decreasing the number of inhibitors by a factor of 2.4,

344 demonstrating a predilection towards false-enhancers in the primary screen. Following  
345 the secondary screen and retest, 23 compounds remained. Notably, all enhancers  
346 identified in the primary screen failed to pass the secondary screens (Fig. 6B, Table 2).

347 Of the 23 candidate autophagy inhibitors, 7 were excluded based on limited  
348 solubility and permeability, and 11 more were discarded upon acquisition of fresh  
349 powder from commercial sources. Among the 5 remaining autophagy inhibitors (Fig 6C,  
350 Table 2), the top 3 candidates consistently tested among the most potent inhibitors in all  
351 assays. Additionally, each compound elicited a dramatic perinuclear accumulation of  
352 Dendra2-LC3 in modified HEK293T cells (Fig. 6C), suggestive of a late-stage block in  
353 autophagosome maturation.

354 We next sought to validate the ability of these compounds to inhibit autophagy  
355 using an alternative flux assay. To do so we utilized a HeLa cell line stably  
356 overexpressing the tandem RFP-GFP-LC3 reporter<sup>59</sup>. In this system, LC3 is fused to an  
357 acid-sensitive GFP as well as an acid-insensitive RFP. Upon progression from  
358 autophagosome to autolysosome, GFP fluorescence is quenched as the sensor enters  
359 an acidic environment. Application of autophagy inhibitors such as bafilomycin-A1 that  
360 inhibit lysosomal acidification result in the appearance of GFP(+)/RFP(+) (yellow)  
361 autophagosomes (Fig. S4A). All 5 of the newly-identified compounds significantly  
362 increased yellow puncta accumulation in RFP-GFP-LC3 HeLa cells, indicative of  
363 effective autophagy inhibition. To assess this effect in an automated and unbiased  
364 manner, we developed an image analysis pipeline that identifies cytoplasmic puncta and  
365 reports the fraction of GFP(+)/RFP(+) puncta (Fig. S4B). Using this pipeline we observed  
366 dose-dependent effects for each compound across similar concentration ranges as  
367 those observed in Dendra2-LC3 HEK293T cells (Fig. S4C; Fig. S5). After 12h, all  
368 compounds save #2 had reached their maximal response (Fig. S4D). Compounds 1,4,  
369 and 5 exerted more than half their maximum effect immediately after drug addition.  
370 Quinacrine, a previously reported autophagy inhibitor<sup>60</sup>, showed similar kinetics (Fig.  
371 S4E), while the response of compound 3 more closely matched the kinetics of  
372 bafilomycin-A1.

373 We next asked whether these compounds exhibited intrinsic fluorescence that  
374 might interfere with our assessment of autophagic flux. Compound 4 did not produce red  
375 fluorescence at any concentration tested, but we observed dose-dependent red  
376 fluorescence for all other compounds (Fig. S5A). Even so, each compound inhibited  
377 autophagy in both flux assays at concentrations where intrinsic fluorescence is minimal

378 (Fig. S5B). In the green channel, all drugs produced significant green fluorescence with  
379 the exception of compound 4. Application of compound 3 resulted in the appearance of  
380 bright perinuclear puncta that could confound estimates of GFP(+)/RFP(+) puncta in  
381 HeLa cells. Indeed, in this assay a lower concentration of compound 3 was needed to  
382 exert an effect than in the Dendra2-LC3 flux assay, which should be unaffected by  
383 changes in green fluorescence (Fig. S5B).

384 To exclude any possible contribution of fluorescence in the measurement of flux,  
385 we assessed autophagy inhibition using an orthogonal assay that does not rely on  
386 fluorescent readouts. Treatment with compounds 1 and 2 resulted in a significant and  
387 reproducible accumulation of LC3-II by western blotting, indicative of impaired  
388 autophagosome clearance (Fig. 6D,E). Together these data demonstrate that both  
389 compounds are indeed autophagy inhibitors; however, the intrinsic fluorescence of  
390 compound 2, and to a lesser extent compound 1, can complicate readouts of flux in  
391 fluorescence-based autophagy assays.

392

14

393 **TABLE 2:** Summary of Maybridge library screen and orthogonal autophagic flux assays.

| Phase                   | # compounds | %    | Enhancer | Inhibitor |
|-------------------------|-------------|------|----------|-----------|
| Maybridge Library       | 24000       | 100  | NA       | NA        |
| Primary                 | 2160        | 9    | 1958     | 202       |
| Primary confirmation    | 232         | 0.97 | 148      | 84        |
| Secondary               | 41          | 0.17 | 3        | 39        |
| Secondary confirmation  | 23          | 0.1  | 0        | 23        |
| passed med chem filters | 16          | 0.07 | 0        | 16        |
| retest reordered drugs  | 5           | 0.02 | 0        | 5         |
| GFP-RFP-LC3 HeLa        | 5           | 0.02 | 0        | 5         |
| LC3II western blot      | 2           | 0.01 | 0        | 2         |

394

395 **Enhancing autophagic flux suppresses toxicity in a primary neuron model of ALS**

396 We previously demonstrated that autophagy induction using a family of small  
397 molecules protected against TDP43-mediated toxicity in models of ALS/FTD<sup>40</sup>. Here we  
398 sought to test whether any enhancers identified in our compound screens conferred  
399 similar neuroprotection. To accomplish this we turned to automated fluorescence  
400 microscopy (AFM), a technology capable of individually tracking thousands of cells  
401 prospectively over time<sup>61,62</sup>. Primary rodent spinal and cortical neurons were transfected  
402 with Dendra2-LC3, photoconverted with a brief pulse of blue light and imaged by AFM  
403 (Fig. 7A). Because the platform measures single-cell intensity within the TRITC channel  
404 over time, we are able to calculate a half-life for Dendra2-LC3, corresponding to  
405 autophagic flux, within each neuron. Cortical neurons exhibited slightly higher basal  
406 rates of autophagy than spinal neurons, with a mean single-cell Dendra2-LC3 half-life of  
407 33.2h compared to 37.1h seen in spinal neurons (Fig. S6A,B,  $p=7.1 \times 10^{-4}$ , Welch two  
408 sample t-test).

409 We also determined the lifespan of each neuron using custom scripts that assign  
410 a time of death for each cell<sup>62,63</sup>. To assess the relationship between basal rates of  
411 autophagy in neurons and their survival, we incorporated Dendra2-LC3 half-life as a  
412 continuous variable into a Cox proportional hazards model of neuronal survival<sup>64</sup> (Fig.  
413 7B). For both cortical and spinal neurons, rapid turnover of Dendra2-LC3 was associated  
414 with extended lifespan (Fig. 7C, cortical:  $p=3.4 \times 10^{-9}$ , spinal  $p=1.1 \times 10^{-6}$ , Cox hazards  
415 analysis). These results indicate that higher rates of basal autophagic flux are  
416 associated with prolonged neuronal survival *in vitro*, providing further rationale for the  
417 development of autophagy activators for neurodegenerative diseases.

418 NVP-BEZ235 (dactolisib) was among the most potent autophagy enhancers  
419 identified using Dendra2-LC3 HEK cells (Figs. 3,4). In light of our prior data attesting to  
420 the benefit of autophagy induction in ALS/FTD models and the proportional relationship  
421 between autophagic flux and neuronal survival (Fig. 7C), we predicted that NVP-BEZ235  
422 could prevent neurodegeneration in disease models. We therefore tested this compound  
423 in neurons overexpressing TDP43, an RNA binding protein whose accumulation is  
424 integrally connected with both ALS and FTD<sup>65,66</sup>. In prior studies, TDP43 overexpression  
425 reproduced characteristic features of disease, including the formation of ubiquitin- and  
426 TDP43-positive neuronal inclusions, cytoplasmic TDP43 mislocalization, and  
427 neurodegeneration<sup>40,67,68</sup>. As expected, TDP43 overexpression resulted in an increase in  
428 the risk of death in comparison to neurons transfected with EGFP, a control protein.

429 Treatment with NVP-BEZ235 significantly prolonged the survival of neurons  
430 overexpressing TDP43 ( $p < 0.05$ , HR=0.89, Cox hazards analysis), without adversely  
431 affecting EGFP-expressing neurons (Fig. 7D, Table 3). These data demonstrate the  
432 therapeutic potential of NVP-BEZ235 as an autophagy inducer capable of extending  
433 neuronal survival in ALS/FTD models.  
434



17

435 **TABLE 3:** Summary of Cox proportional hazards analysis

| <b>Comparison</b>                                     | <b>Hazard Ratio</b> | <b>p-value</b>  |
|-------------------------------------------------------|---------------------|-----------------|
| GFP/DMSO vs. TDP43-GFP/DMSO                           | <b>1.74</b>         | <b>1.02E-18</b> |
| GFP/DMSO vs. GFP/25nM NVP-BEZ235                      | 1.02                | 0.67            |
| WT-TDP43-GFP DMSO vs. WT-TDP43-GFP/<br>25nM NVPBEZ235 | <b>0.89</b>         | <b>0.03</b>     |

436

437

438 **Discussion**

439 In this study we developed a unique human reporter cell line enabling the non-  
440 invasive measure of autophagic flux in living cells, without interference from pathway  
441 intermediates or potentially toxic pathway inhibitors. Building on previous efforts to  
442 isolate autophagic clearance from induction<sup>69,40,59</sup>, here we created a system with the  
443 pivotal capacity to assess *native* autophagic flux, thereby avoiding several basic  
444 confounds associated with overexpression of autophagy reporters<sup>70,71</sup>. This is of  
445 particular relevance considering the intersection between autophagy and nutrient/energy  
446 sensing<sup>42</sup>, the role of microtubule associated transport in autophagosome maturation<sup>48</sup>,  
447 and the crosstalk between autophagy and the ubiquitin proteasome system<sup>44</sup>. Increasing  
448 protein dosage can also induce aberrant aggregation of misfolded proteins, and  
449 influence the likelihood of protein phase separation<sup>70,72</sup>. Beyond the potential toxicity  
450 associated with these outcomes, overexpression of LC3 and LC3-based reporters is  
451 sufficient to produce visible puncta that could be mistaken for autophagosomes.

452 Through the targeted insertion of Dendra2 into the *MAP1LC3B* locus, we  
453 generated reporter cell lines in which Dendra2-LC3 expression is driven by the  
454 endogenous *MAP1LC3B* promoter. As such, the baseline fluorescence intensity of non-  
455 photoconverted (green) Dendra2-LC3 reflects the steady-state balance between LC3  
456 synthesis and degradation. We took advantage of this relationship to quickly and  
457 accurately gauge the effects of compounds that enhance or inhibit autophagy, without  
458 the need for photoconversion of Dendra2-LC3. Such an approach can be problematic in  
459 overexpression-based systems, but it provided a robust means of estimating autophagic  
460 flux on a high-throughput basis in Dendra2-LC3 HEK cells. Future studies employing a  
461 full bleach or photoconversion of Dendra2-LC3 could be useful for investigating  
462 autophagy regulation at the level of transcription or protein synthesis, and for identifying  
463 genetic and/or pharmacologic approaches that induce autophagy at an early stage.

464 Previous high-throughput screens for autophagy modulators utilized the  
465 formation of LC3-positive puncta as the major criterion for autophagy induction<sup>58,57</sup>. As  
466 late stage autophagy inhibition is equally effective as autophagy induction for triggering  
467 the accumulation of LC3 puncta, such analyses are unable to discriminate whether a  
468 drug truly enhances or blocks flux. For example, the drugs loperamide and astemizole,  
469 two drugs found here to enhance flux, were also identified as potential autophagy  
470 inducers based on their ability to increase LC3 puncta<sup>58</sup>. However, niclosamide was also  
471 labeled as an inducer because of its effect on LC3 puncta, but was in fact a strong

472 inhibitor of flux in Dendra2-LC3 cells. Further supporting the apparent disconnect  
473 between puncta number and autophagic activity, we identified several compounds that  
474 increased Dendra2-LC3 puncta without markedly impacting Dendra2-LC3 levels (Fig.  
475 5A). As such, reporters that judge the clearance of autophagy substrates are intrinsically  
476 more suited to gauging autophagic flux than are those that focus on pathway  
477 intermediates such as autophagosome number. Because autophagy is a dynamic  
478 pathway that requires coordinated regulation of several critical steps, increasing  
479 autophagy *induction* without an accompanying downstream increase in substrate  
480 clearance is likely to be of little therapeutic benefit and may even be maladaptive<sup>73,74</sup>.  
481 Therefore, we placed particular emphasis on enhancing *productive* autophagy and the  
482 measurement of autophagic flux through the use of non-invasive reporters.

483 In comparison to alternative methods for measuring autophagic flux, Dendra2-  
484 LC3 cells offer unique advantages. Not only do these cells afford the only means of  
485 estimating *native* autophagic flux in living cells, but they also preclude the need for  
486 overexpression of LC3 analogues, thereby avoiding many of the pitfalls that plague other  
487 approaches. For instance, while the GFP-LC3-RFP-LC3 $\Delta$ G reporter<sup>69</sup> is likewise capable  
488 of discriminating LC3 synthesis from degradation, measurements of autophagic flux  
489 using this probe require relating the degradation rates of two proteins, one of which is an  
490 autophagy marker and substrate (GFP-LC3) and another that is untethered within the  
491 cytoplasm (RFP-LC3 $\Delta$ G). Conditions that stabilize RFP-LC3 $\Delta$ G without accelerating  
492 GFP-LC3 clearance could be misinterpreted as increasing flux. Supporting this notion, in  
493 a screen using the GFP-LC3-RFP-LC3 $\Delta$ G reporter, MG132 was identified as an  
494 autophagy enhancer<sup>69</sup>, while we found that MG132 instead stabilized Dendra2-LC3.  
495 Conversely, compounds such as loperamide that enhance proteolytic clearance via the  
496 ubiquitin-proteasome pathway<sup>75</sup> may be mislabeled as autophagy inhibitors because of  
497 their preferential effects on RFP-LC3 $\Delta$ G.

498 Several drugs purported to stimulate autophagy—including trehalose<sup>76,77</sup>,  
499 metformin<sup>78,79,80,81</sup>, and carbamazepine<sup>82,83,84</sup>—failed to do so in our Dendra2-LC3 cell  
500 line. Despite promising results in mouse models of Huntington's disease<sup>76</sup>, ALS<sup>85</sup>, and  
501 Parkinson's disease<sup>86</sup>, evidence that trehalose induces autophagy is variable, with some  
502 studies claiming that the drug actually inhibits flux<sup>87,88,69</sup>. Likewise, the ability of  
503 carbamazepine to enhance autophagic flux and prevent neurodegeneration was based  
504 upon changes in steady-state levels of autophagy intermediates<sup>83,84</sup>. Our data suggest  
505 that the protective effects of these drugs may not be a result of autophagy stimulation.

506 However, the discrepancy in findings may be due to the high concentration of these  
507 drugs used in previous studies<sup>81,79,80,89,77,82</sup> relative to the 10uM dose used in our  
508 screens, as well as species and cell type specific differences.

509 Our screen of the Maybridge library suggests that uncovering novel autophagy  
510 enhancers may be considerably more challenging than inhibitors. Testing larger libraries  
511 or incorporating iterative chemical synthesis guided by structure-activity relationships<sup>50</sup>  
512 may be required to effectively identify new autophagy-inducing compounds. Even so,  
513 compounds 1 and 2 were repeatedly found to inhibit autophagy in Dendra2-LC3 cells,  
514 RFP-GFP-HeLa cells, and via immunoblotting. While these drugs hold potential for the  
515 treatment of neoplasms that rely on autophagy for survival, their potency, activity, and  
516 bioavailability could be improved through similar means.

517 Despite the broad therapeutic potential of autophagy modulation, there are no  
518 clinically-approved drugs that have been specifically developed to target autophagy<sup>7</sup>.  
519 Our work with NVP-BEZ235 presents a potential template to evaluate the efficacy of  
520 putative autophagy modulators. We validated the autophagy-enhancing effects of the  
521 compound in Dendra2-LC3 HEK293T cells, and further utilized these cells to establish a  
522 dose-response relationship that informed subsequent studies demonstrating the drug's  
523 therapeutic effects in a model of ALS and FTD. Given previous data indicating the ability  
524 of NVP-BEZ235 to suppress amyloid- $\beta$  induced neurotoxicity<sup>90</sup>, and our results showing  
525 its potential in a model of ALS and FTD, this compound may be broadly effective in  
526 stimulating autophagy and preventing neuron loss arising from the accumulation of  
527 misfolded proteins in Alzheimer's disease as well as ALS, FTD, and related conditions.

528 Autophagy has alternatively been reported to play protective or detrimental roles  
529 in ALS<sup>91,92</sup>. In our previous work, pharmacological activation of neuronal autophagy  
530 suppressed TDP43 mediated toxicity<sup>40</sup>. This is in accordance with the protective effects  
531 of rapamycin in a TDP43 mouse model<sup>84</sup>. In contrast, rapamycin administration in SOD1  
532 mice exacerbated muscle degeneration and shortened lifespan<sup>93</sup>. One study in which  
533 autophagy was genetically ablated from motor neurons in SOD1 (G93A) mice provided  
534 further insight into the conflicting roles of autophagy in ALS<sup>73</sup>. Loss of autophagy in  
535 motor neurons accelerated disease onset but also prolonged survival. This study  
536 suggested that early in disease autophagy plays a critical role in the maintenance of  
537 neuromuscular junctions. However, at later stages it promotes disease progression in a  
538 non-cell-autonomous manner. Our work further supports a protective role of autophagy  
539 enhancement in ameliorating toxicity associated with the accumulation of TDP43. Future

540 studies may determine whether NVP-BEZ235 confers similar beneficial effects in other  
541 disease models involving SOD1 or RNA binding proteins related to TDP43. Even so,  
542 neurons respond poorly to most autophagy-inducing stimuli, making them a particularly  
543 challenging cell type to target for therapy development<sup>51,94,95</sup>. Additional investigations  
544 involving the introduction of Dendra2 into the *MAP1LC3B* locus of induced pluripotent  
545 stem cells may be critical for defining the cell type-specific mechanisms governing  
546 autophagy within neurons and other cell types.

547 While this technology represents a considerable advancement, it is not without  
548 limitations. Chief among these is the reliance on reductions in Dendra2-LC3 signal  
549 intensity to indicate enhanced flux. For this reason, we developed automated programs  
550 to selectively remove drugs with toxic effects that might otherwise be misclassified as  
551 false-positives. Since HEK293T cells are actively dividing, compounds that merely inhibit  
552 growth rate may also be falsely identified as enhancers when measuring GFP  
553 fluorescence, necessitating the use of counter-screens involving the measurement of  
554 photoconverted (red) Dendra2-LC3 half-life to eliminate these false-positives from the  
555 final pool of candidate compounds. We imaged multiple frames/well and multiple wells to  
556 account for autofluorescence artifacts that are common in the red channel, but the use of  
557 brighter fluorophores or photoconvertible fluorescent proteins that emit in the far-red  
558 wavelengths may avoid these complications<sup>96</sup>.

559 Additionally, due to the assay's reliance on measuring fluorescent intensity,  
560 drugs that exhibit intrinsic fluorescence can confound flux measurements. In unlabeled  
561 HEK293T cells, compound 3 from the Maybridge library screen and the drug Bim-1  
562 accumulated within bright fluorescent perinuclear puncta with striking resemblance to  
563 puncta observed in bafilomycin-A1 treated Dendra2-LC3 HEK293T cells (Fig. S3). We  
564 therefore counter-screened all candidates in unlabeled HEK293T cells and eliminated  
565 those exhibiting intrinsic fluorescence at the concentrations tested. We also confirmed  
566 autophagy inhibition using a non-imaging based flux assay. Despite the fact that all 5  
567 Maybridge library hits demonstrated autophagy-inhibiting properties in RFP-GFP-LC3  
568 expressing HeLa cells, immunoblotting revealed that only compounds 1 and 2 produced  
569 a significant increase in LC3-II levels. Therefore, due to its reliance on measuring  
570 fluorescence intensity, the RFP-GFP-LC3 flux assay suffers from the same problem in  
571 misidentifying intrinsically fluorescent drugs as inhibitors. Any fluorescence-based  
572 autophagy assays are likely to be similarly impacted by intrinsic fluorescence,  
573 emphasizing the need to account for these effects in screening efforts.

574           Ideally, future studies will evaluate autophagic flux using complimentary reporters  
575 that provide valuable information on mechanism of action, in addition to magnitude and  
576 potency. Such an approach, coupled with a shift toward analyzing the productive  
577 autophagic clearance of substrates expressed at endogenous levels, promises to  
578 accelerate and facilitate the discovery of novel autophagy-modulating compounds with  
579 wide-ranging therapeutic potential.

580

## 581 **Methods**

### 582 **Cell Culture**

583 HEK293T Dendra2-LC3 and HeLa RFP-GFP-LC3 cells were cultured in HEK complete  
584 media consisting of Dulbecco's Modified Eagle Medium (DMEM) (GIBCO, Waltham, MA,  
585 cat #: 11995-065) supplemented with 20% fetal bovine serum, 1% GlutaMAX (GIBCO,  
586 cat #: 35050-061) and penicillin-streptomycin. For imaging experiments cells were  
587 placed in Neumo media (Cell Guidance Systems, Cambridge, UK, cat #: M07-500) with  
588 SOS supplement (Cell Guidance Systems, cat #: M09-50).

589

### 590 **CRISPR editing**

591 Single guide RNA pairs (sgRNAs; Table 4) were selected using the CRISPR design tool  
592 available at <http://crispr.mit.edu/>. Sense and antisense oligonucleotides encoding each  
593 sgRNA (Table 4) were annealed and inserted into the BbsI site of the pX335 vector  
594 (Addgene, 42335), according to protocols available on the Addgene website.

595

596 **TABLE 4:** Sense and antisense oligonucleotides cloned into pX335 plasmid

| oligo                    | sequence                          |
|--------------------------|-----------------------------------|
| LC3bD2_Forward_Sense     | CAC CGT TCG GTG AGT GTC GCC GCG A |
| LC3bD2_Forward_Antisense | AAA CTC GCG GCG ACA CTC ACC GAA C |
| LC3bD2_Reverse_Sense     | CAC CGT TCT CCG ACG GCA TGG TGC A |
| LC3bD2_Reverse_Antisense | AAA CTG CAC CAT GCC GTC GGA GAA C |

597

598

599 The homology directed repair (HDR) donor vector was synthesized in the  
600 pUCminusMCS backbone by Blue Heron Biotechnology (Bothell, WA). The donor  
601 sequence consisted of the Dendra2 ORF flanked by 400bp of homologous sequence  
602 upstream and downstream of *MAP1LC3B* start codon. 1.25ug of pX335-Forward-  
603 sgRNA, 1.25ug of pX335-Reverse-sgRNA, and 2.5ug of the homology donor were  
604 transfected into HEK-293T cells using lipofectamine 2000 (Invitrogen, Waltham, MA),  
605 according to the manufacturers suggested protocol. Cells were selected based on  
606 fluorescence and passaged to homogeneity.

607

#### 608 **Western Blotting and antibodies**

609 HEK293T cells were lysed in RIPA buffer (Thermo, Waltham, MA, cat #89900) containing  
610 protease inhibitors (Roche, Basel, Switzerland, cat #11836170001).

611



612 **TABLE 5:** Antibodies used in this study

| <b>Antibody</b>                | <b>dilution</b> | <b>manufacturer</b> | <b>Cat #</b> |
|--------------------------------|-----------------|---------------------|--------------|
| Rabbit anti-LC3                | 1:1000          | Cell Signaling      | 2775S        |
| Rabbit anti-ATG5               | 1:1000          | Cell Signaling      | 129945       |
| Mouse anti-GAPDH               | 1:1000          | Millipore           | MAB374       |
| Donkey anti-Mouse iRDye 680RD  | 1:10,000        | LICOR               | 926-68072    |
| Donkey anti-Rabbit iRDye 800CW | 1:10,000        | LICOR               | 926-32213    |

613

614 **siRNA knockdown**

615 HEK293T cells were plated at 60% confluency, then transfected the next day using  
616 DharmaFECT 1 Transfection reagent (Dharmacon, LaFayette, CO, T-2001-02) and the  
617 following siRNAs from Dharmacon: ON-TARGETplus ATG5 Smartpool siRNA (L-  
618 004374-00-0005), ON-TARGETplus MAP1LC3B Smartpool siRNA (L-012846-00-0005)  
619 or non-targeting siRNA (D-001810-01-05), at a concentration of either 20nM and 40nM.  
620 Cells were imaged and lysates were collected 2d after siRNA transfection.

621

622 **Primary screen**

623 HEK293T Dendra2-LC3 cells were plated in HEK complete media at  $1.1 \times 10^5$  cells/mL on  
624 ViewPlate 384w plates (Perkin Elmer, Waltham, MA, cat #: 6007460) using a Multidrop  
625 Combi (Thermo Scientific, cat #: 5840300), adding 50uL to each well. Approximately 48h  
626 later, and immediately prior to imaging, HEK complete media was exchanged with  
627 Neumo+SOS media using a Biomek FX<sup>P</sup> laboratory automation workstation (Beckman  
628 Coulter, Brea, CA). To avoid dislodging cells during the media exchange, 35uL of the  
629 HEK media was removed and replaced with 45uL Neumo+SOS. Another 45uL was  
630 removed and replaced with Neumo+SOS, effectively diluting out the concentration of  
631 HEK complete media to 6.25%. Cells were imaged with an ImageXpress Micro  
632 (Molecular Devices, San Jose, CA) equipped with a 20x objective lens. After imaging in  
633 the GFP channel (Semrock, Rochester, NY, FITC-3540B-NTE-ZERO filter) to measure  
634 baseline fluorescence intensity, compounds were added using a BioMek FX pintool  
635 (Beckman Coulter) at a concentration of 10 $\mu$ M, with the exception of the positive control  
636 Torin1, which was added at 1 $\mu$ M. Plates were imaged again 15h after drug addition. One  
637 image was acquired per well. Images were background subtracted using FIJI  
638 (<https://fiji.sc/>) with a rolling ball radius of 150. Mean GFP fluorescence intensity was  
639 calculated on a whole well basis. Enhancers are defined as:  $[\text{Sample}_{15\text{H GFP}/0\text{H GFP}}] <$   
640  $[\text{DMSO}_{15\text{H GFP}/0\text{H GFP}} - 3\text{SD}_{\text{DMSO}}]$  and inhibitors as:  $[\text{Sample}_{15\text{H GFP}/0\text{H GFP}}] >$   
641  $[\text{DMSO}_{15\text{H GFP}/0\text{H GFP}} + 3\text{SD}_{\text{DMSO}}]$ . Using a custom FIJI script that measured the area of occupied by cells,  
642 toxic compounds were identified as those that elicited a reduction in cellular area  $\geq 3\text{SD}$ ,  
643 verified by eye.

644

645 **Secondary screen**

646 Plating of HEK293T Dendra2-LC3 cells and media exchange were performed as in the  
647 primary screen, described above. Two sites per well were imaged in the Texas Red

648 (RFP) (Semrock TxRed-4040C-NTE-ZERO filter) channel prior to photoconversion to  
649 establish background fluorescence levels. Photoconversion was accomplished using a  
650 4s DAPI (Semrock Brightline DAPI-5060-NTE-ZERO filter) exposure, and afterwards the  
651 cells were immediately imaged once more in the RFP channel. The plate was then  
652 removed from the ImageXpress stage and compounds were added to 3 replicate wells  
653 via the BioMekFX automation station at a working concentration of 10 $\mu$ M. The plate was  
654 then returned to the ImageXpress and imaged every 1.5h in a recurring loop for 16h,  
655 while maintaining 5% CO<sub>2</sub>, humidity and a temperature of 37C. Initial optimization  
656 studies demonstrated a maximal Z' = 0.79 within 9h of drug addition, and therefore this  
657 time was selected for measuring autophagic flux. We defined enhancers and inhibitors  
658 by the following criteria: enhancer,  $[\text{Sample}_{9\text{H RFP}}/(\text{Postconversion RFP} - \text{background RFP})] < [\text{DMSO}_{9\text{H}}$   
659  $\text{RFP}/(\text{Postconversion RFP} - \text{background RFP}) - 3\text{SD}_{\text{DMSO}}$ ]; inhibitor,  $[\text{Sample}_{9\text{H RFP}}/(\text{Postconversion RFP} - \text{background}$   
660  $\text{RFP})] > [\text{DMSO}_{9\text{H RFP}}/(\text{Postconversion RFP} - \text{background RFP}) + 3\text{SD}_{\text{DMSO}}$ . Images with autofluorescent  
661 artifacts were excluded and the remaining images were averaged on a per compound  
662 basis.

663

#### 664 **RFP-GFP-LC3 assay**

665 HeLa RFP-GFP-LC3 cells<sup>59</sup> were plated at 80% confluency in HEK complete media.  
666 Prior to imaging, cells were switched to Neumo+SOS media. Cells were imaged at  
667 baseline as well as 0, 4, 8, and 12h after drug addition. Images were background  
668 subtracted using the rolling ball background subtraction plugin in FIJI, with a radius =  
669 150. LC3 puncta were identified and quantified using CellProfiler 3.0  
670 (<https://cellprofiler.org/>) utilizing a customized pipeline  
671 (<https://github.com/BarmadaLab/LC3-puncta>). Briefly, a series of image processing  
672 operations are performed to segment a cell into nuclear and cytoplasmic compartments.  
673 The contrast between puncta and background is further enhanced to emphasize LC3  
674 puncta in both GFP and RFP images. Object-oriented colocalization then records the  
675 number of cytoplasmic red puncta that are also green, representing autophagosomes.

676

#### 677 **Primary neuron survival assay**

678 Primary neurons were dissected from the cortex of embryonic day 20 rat pups and  
679 plated at a density of 1x10<sup>5</sup> cells/well on a laminin/poly-D-lysine coated 96 well  
680 plate<sup>686397</sup> in Neumo complete media (Cell Guidance Systems M07-500). Transfection  
681 and longitudinal microscopy were performed as previously described<sup>62</sup>. Briefly, DIV4

682 neurons were transfected using lipofectamine 2000 (Invitrogen). Neurons were  
683 incubated with Lipofectamine-DNA mixtures for 20 minutes followed by washes with  
684 Neurobasal media containing 1 mM kynurenic acid to remove residual lipofectamine.  
685 Neurons were then placed in half conditioned media and half fresh Neumo+SOS media.  
686 A Eclipse Ti inverted microscope (Nikon, Tokyo, Japan) equipped with PerfectFocus,  
687 Semrock GFP and TRITC filters, Lambda XL lamp (Sutter Instruments, Novato, CA) and  
688 an Andor Zyla 4.2(+) sCMOS camera (Oxford Instruments, Abingdon, UK) was used to  
689 acquire images at 20x. To maintain a temperature of 37C and 5% CO2 levels, the  
690 microscope was encased in a custom-built plexiglass environmental chamber.  
691 Automated stage movements, filter turret rotation, and image acquisition were controlled  
692 via  $\mu$ Manager with original code written in BeanShell. In-house software was used to  
693 assign a barcode for each neuron, measure its fluorescent intensity, and register time of  
694 death as described previously<sup>61,62,63,98,99</sup>. For optical pulse labeling experiments a 1.5s  
695 pulse of 405nm light was used for photoconversion. For studies relating the rate of  
696 Dendra2-LC3 turnover to neuronal survival only cells that lived the entire duration of  
697 OPL imaging were included in the survival analysis.

698

### 699 **Figure Legends**

#### 700 **Figure 1: Creation of a stable cell line serving as a reporter for autophagic flux.**

701 (A) Illustration depicting the use of optical pulse labeling (OPL) to measure autophagic  
702 flux. Dendra2 is a photoconvertible protein that upon exposure to 405nm light irreversibly  
703 shifts its fluorescence from green to red. Photoconverted Dendra2-LC3 is degraded in  
704 lysosomes, resulting in a drop in red fluorescence intensity. The time dependent decay  
705 of red signal serves as an estimate of autophagic flux independent of new (green) LC3-  
706 Dendra2 synthesis. (B) Schematic for tagging native LC3 using CRISPR/Cas9 genome  
707 editing. In HEK293T cells, the Dendra2 ORF was introduced into the *MAP1LC3B* locus  
708 upstream of exon 1 creating an N-terminal fusion protein upon translation. (C) Western  
709 blot confirming the successful labeling of LC3 with Dendra2. Dendra2-LC3 HEK293T  
710 cells were treated with 20nM siRNA targeting LC3 or scrambled siRNA. Lysates were  
711 collected after 48h and immunoblotted with an LC3 antibody, demonstrating the  
712 Dendra2-LC3 fusion protein running at the expected MW of 43kDa that disappears upon  
713 siRNA-mediated knockdown of LC3. GAPDH serves as a loading control. (D) Dendra2-  
714 LC3 reporter line imaged in GFP channel 48h after application of siRNA. Scale bar =

715 100 $\mu$ m (E) Dendra2-LC3 cells imaged 6 hours after treatment with vehicle, 1 $\mu$ M Torin1,  
716 and 20nM Bafilomycin-A1. Scale bar =10 $\mu$ m

717

718 **Figure 2: Time dependent decay of Dendra2-LC3 serves as an accurate measure**  
719 **of autophagic flux.**

720 (A) Dendra2-LC3 HEK293T cells were imaged prior to photoconversion to measure  
721 background RFP intensity. Immediately following photoconversion, cells were treated  
722 with DMSO, 1 $\mu$ M Torin1, or 10nM Bafilomycin-A1 and imaged at the indicated times.  
723 Images are pseudocolored to better highlight intensity differences. Scale bar = 50 $\mu$ m (B-  
724 E) Time dependent changes in photoconverted Dendra2-LC3 fluorescence in the RFP  
725 (B, C) and GFP (D, E) channels. Intensity measurements were obtained prior to (dark  
726 grey) and following photoconversion (light grey) and normalized. For RFP  
727 measurements, the background intensity prior to conversion was set to 0 and the post-  
728 conversion value to 1. GFP values are scaled to the pre-conversion intensity. Error bars  
729 represent SEM from 3 replicate experiments. (B) Treatment with 1 $\mu$ M Torin1 accelerates  
730 Dendra2-LC3 decay, reflecting enhanced autophagic degradation of the reporter, while  
731 treatment with bafilomycin-A1 stabilizes reporter half-life. (D) Photoconversion results in  
732 a 40% drop in GFP intensity. As new Dendra2-LC3 is synthesized, GFP levels return to  
733 pre-photoconversion levels over the span of 13.5h. Torin1 blocks the observed return in  
734 GFP fluorescence by accelerating flux. Genetic inhibition of autophagy via siRNA-  
735 mediated knockdown of ATG5 2d prior attenuates Torin1's effects in both the RFP (C)  
736 and GFP (E) channels. For plots B-D \* indicates significant difference ( $p<0.05$ ) using  
737 DMSO as reference group with Tukey's multiple comparisons test. # indicates  $p<0.05$   
738 with the scramble control for each drug treatment as the reference group (i.e Scramble  
739 siRNA 1 $\mu$ M Torin1 vs. ATG5 siRNA 1 $\mu$ M Torin1). Superscript number indicates the first  
740 time point when significance was achieved.

741

742 **Figure 3: Small-scale screen in Dendra2-LC3 HEK293T cells confirm assay validity**  
743 **and identify new autophagy modulators.**

744 (A) An unbiased screen of the Enzo autophagy compound library identified several  
745 known autophagy-modulating compounds, including enhancers (rapamycin, NVP-  
746 BEZ235, AKT inhibitor X) and inhibitors (bafilomycin-A1). All drugs were added at a final  
747 concentration of 10 $\mu$ M via liquid handler, and autophagic flux estimated by their effects  
748 upon clearance of photoconverted (red) Dendra2-LC3 9h after drug addition. (B)

749 Representative images of red Dendra2-LC3 immediately post-conversion and 9h after  
750 drug addition, demonstrating relatively rapid clearance with application of enhancers and  
751 marked accumulation of Dendra2-LC3 with inhibitors. Scale bar = 100 $\mu$ m (**C**) The effect  
752 of autophagy enhancers on Dendra2-LC3 half-life is attenuated by siRNA-mediated  
753 knockdown of ATG5 2d prior to drug application. Two-Way ANOVA indicated a  
754 significant interaction between time and treatment  $F(126,300)=15.22$ ,  $p<0.0001$  and  
755 significant effects for treatment  $F(9,300)=3427$ ,  $p<0.0001$  and time  $F(14,300)=957.3$ ,  
756  $p<0.0001$  (**D**) Similar effects are observed in the green channel. Two-Way ANOVA found  
757 a significant interaction between time and treatment  $F(126,300)=20.71$ ,  $p<0.0001$ . as  
758 well as significant main effects for treatment  $F(9,300)=721$ ,  $p<0.0001$  and time  
759  $F(14,300)=320.8$ ,  $p<0.0001$ . For (C) and (D) Error bars represent SEM from 3 replicate  
760 experiments. # indicates  $p<0.05$  using Tukey's multiple comparisons test with the  
761 scramble control for each drug treatment as the reference group (i.e Scramble siRNA  
762 Torin1 vs. ATG5 siRNA Torin1). Superscript number indicates the first time point when  
763 significance was achieved.

764

765 **Figure 4: Proportional and bidirectional effects of autophagy modulators**  
766 **highlight assay sensitivity.**

767 (**A**) Dendra2-LC3 HEK293T cells were treated with increasing concentrations of Torin1  
768 and bafilomycin-A1. Representative images in the GFP (top) and RFP (bottom)  
769 channels, pseudocolored to accentuate intensity variations. Scale bar = 100 $\mu$ m (**B**)  
770 Dendra2-LC3 clearance increased in a dose-dependent manner with Torin1 (**B**), while  
771 bafilomycin-A1 resulted in dose-dependent prolongation of Dendra2-LC3 half-life (**C**).  
772 These changes are even more apparent in the GFP channel for both Torin1 (**D**) and  
773 bafilomycin-A1 (**E**). Error bars represent SEM from 8 replicate wells. For plots B-E \*  
774 indicates significant difference ( $p<0.05$ ) using DMSO as reference group with Dunnett's  
775 multiple comparisons test. Superscript number indicates the first time point when  
776 significance was achieved. (**F**) Dose-response curves for Torin1, NVP-BEZ235,  
777 rapamycin, and bafilomycin-A1. For autophagy enhancers, the minimal RFP intensity 7h  
778 after drug treatment relative to DMSO was set to 1, and the maximal value set to 0. For  
779 inhibitors, the maximum effect represents the maximal RFP intensity within 7h after drug  
780 treatment. Dose-response was determined similarly for the GFP channel, utilizing values  
781 14h after drug treatment. Concentration is plotted in nM on a log(2) scale, with  $\geq 3$

782 replicate wells for each channel shown as colored dots. EC50 and IC50 values are  
783 reported along the x-axis for both RFP and GFP.

784

785 **Figure 5: Screening the Prestwick library reveals previously unrecognized**  
786 **autophagy-modulating drugs.**

787 **(A)** “90/10” experiment validating the measurement of Dendra-LC3 in the GFP channels  
788 as a primary assay. 320 wells of a 384w plate were treated with DMSO and 32 were  
789 treated with 1 $\mu$ M Torin1. Plates were imaged in GFP immediately before, and 15h after  
790 drug treatment.  $Z' = .52 \pm 0.04$  in 3 replicates. **(B)** Primary screen of the Prestwick drug  
791 library. Z-score is calculated as number of  $SD_{DMSO}$  greater or less than mean  
792  $DMSO_{15H/0H}$ . Significant changes in flux, toxicity, or puncta for each drug are indicated by  
793 the color and size of representative dots, according to the key. The magnitude of effect  
794 is represented as both % bafilomycin-A1 (left y-axis) and % Torin1 (right y-axis) **(C)**  
795 Time-dependent decay in red (photoconverted) Dendra2-LC3 was used as a secondary  
796 screen of the non-toxic candidates emerging from the primary screen. Error bars  
797 represent the SEM from 6 images (2 images/well of 3 replicate wells).

798

799 **Figure 6: High throughput screening identifies novel autophagy inhibitors.**

800 **(A)** Schematic depicting the screening hierarchy used. **(B)** The primary screen was  
801 performed using the Maybridge 24K library, consisting of 24,000 chemically diverse  
802 compounds. For enhancers, changes in Dendra2-LC3 GFP intensity were normalized to  
803 Torin1's effects. Non-toxic compounds that passed the primary screen were filtered by  
804 re-testing in the GFP channel, then evaluated in a secondary screen involving  
805 calculation of Dendra2-LC3 half-life in the RFP channel. Hits were re-tested in the  
806 secondary screen, followed by repeat evaluation in the RFP channel using fresh  
807 compound from a different distributor. The color and size of each dot denotes the stage  
808 at which individual compounds were eliminated, in accordance with the key. Candidates  
809 that passed all filters are shown in black. **(C)** Representative images of the primary  
810 screen, secondary screen, and repeat secondary screen with fresh drug for the 5  
811 putative autophagy inhibitors, ranked based on the magnitude of inhibition measured in  
812 the initial secondary screen. Z-scores are reported for each screening phase. Scale bar  
813 = 100 $\mu$ m. **(D)** Unmodified HEK293T cells were treated with vehicle or each compound at  
814 either 10 $\mu$ M or 100 $\mu$ M. 9H after treatment lysates were collected and immunoblotted  
815 with an LC3 antibody. **(E)** Quantification of three replicate experiments demonstrating

816 that at 100 $\mu$ M of compounds 1 and 2 significantly inhibit autophagic flux. For each group  
817 LC3-II was normalized to the loading control GAPDH and then scaled to 100nM  
818 bafilomycin-A1. Error bars represent standard error of the mean. One-way ANOVA  
819 showed significant differences between groups ( $F=24.28$ ,  $P<0.0001$ ). \*  $p<0.01$   
820 compared to DMSO, Dunnet's multiple comparison test.

821

822 **Figure 7: Autophagic flux predicts neuronal survival and mitigates toxicity in an**  
823 **ALS/FTD disease model.**

824 (A) Mixed rat spinal neurons were transfected on DIV 4 with Dendra2-LC3, imaged 24h  
825 later (DAY 1 pre), then pulsed with 405nm light to photoconvert Dendra2-LC3 before  
826 imaging repeatedly and longitudinally over several days to track the time-dependent loss  
827 of red fluorescence and neuronal survival. Scale bars = 100 $\mu$ m in each panel. (B)  
828 Experimental outline for determining the relationship between Dendra2-LC3 half-life and  
829 neuronal survival. After calculating Dendra2-LC3 half-life for individual neurons (Stage  
830 1), each cell is prospectively tracked using automated fluorescence microscopy to  
831 determine its time of death (Stage 2; red number and corresponding arrow). (C)  
832 Penalized spline Cox proportional hazards model depicting Dendra2-LC3 half-life (x-  
833 axis) vs. relative risk of death (y-axis) for primary rat cortical (black) and spinal (red)  
834 neurons, demonstrating a strong linear relationship for both populations (cortical:  
835  $p=3.4\times 10^{-9}$ ; spinal  $p=1.1\times 10^{-6}$ , linear Cox proportional hazards). Cortical and spinal  
836 neurons with shorter Dendra2-LC3 half-lives, and therefore higher rates of basal  
837 autophagy, lived longer. Each hash mark represents an individual neuron, collected from  
838 3 biological and 8 technical replicates each. Grey dotted lines mark 95% confidence  
839 intervals. (D) NVP-BEZ235 (25nM NVP) treatment suppresses toxicity in primary rat  
840 cortical neurons overexpressing WT-TDP43-GFP. Table 3 summarizes the hazard ratio  
841 and statistical significance of each comparison as determined by Cox proportional  
842 hazards analysis. N for each group represents total neurons pooled from three replicate  
843 experiments. \*  $p<0.05$ , cox proportional hazards analysis.

844

845 **Figure S1: siRNA knockdown of ATG5**

846 HEK293T cells were transfected with 20nM and 40nM ATG5 siRNA, or 40nM non-  
847 targeting siRNA. Lysates were collected two days later and blotted with ATG5 and  
848 GAPDH antibodies. Relative to scramble siRNA, 20nM and 40nM ATG5 siRNA



849 produced a 58% and 64% knockdown of ATG5 protein, respectively. ATG5 levels were  
850 normalized to GAPDH.

851

852 **Figure S2: Aggregation of Dendra2 tagged proteins causes a supraphysiological**  
853 **increase in signal.**

854 Primary Cortical Neurons were co-transfected on DIV4 with GFP (blue) and a Dendra2-  
855 tagged fragment of mutant huntingtin (HTT) carrying a pathologic expansion of 74  
856 glutamine residues (Dendra2-HTT-exon1-Q74)<sup>100</sup>. On the first day following transfection  
857 Dendra2-HTT-exon1-Q74 was photoconverted with a 1s pulse of 405nm light and  
858 subsequently imaged via automated fluorescence microscopy. The decay in TRITC (red)  
859 intensity was measured every hour as a metric for protein degradation. The TRITC  
860 intensity spikes upon aggregate formation, preventing accurate measurements of protein  
861 half-life. Lines in the plot correspond to the cell labels in white in the image panels. Red  
862 cell labels indicate the time point when a cell has formed an aggregate. Scale bar =  
863 50µm

864

865 **Figure S3: Drugs identified as autophagy modulators display intrinsic**  
866 **fluorescence.**

867 Unmodified HEK293T cells imaged in the Texas Red channel 9H after drug treatment.  
868 Scale bar = 50µm

869

870 **Figure S4: Novel inhibitors block autophagic flux when assessed using**  
871 **independent measures of autophagy.**

872 **(A)** HeLa cells expressing a tandem LC3 reporter (RFP-GFP-LC3) were treated with the  
873 indicated compounds and imaged 12h later in the RFP (middle panels) and GFP (bottom  
874 panels) channels. Composite images are displayed on the top row. Concentrations for  
875 each compound (3nM bafilomycin-A1; 1µM Quinacrine; 50µM 245536; and 100µM of  
876 254522, 45808, 234794, and 237373) correspond to the lowest dose resulting in the  
877 maximum degree of colocalization between GFP and RFP puncta as calculated in (C).  
878 Scale bar: 50µm **(B)** The percentage of RFP(+)/GFP(+) puncta was determined using  
879 CellProfiler<sup>101</sup>. Images from the GFP (1a) and RFP (1b) channels are uploaded into  
880 CellProfiler, nuclei are identified using the GFP channel (2a-green outlines) and a  
881 nuclear mask (2b) is generated. Nuclei that do not pass size or intensity thresholds, or  
882 are on the edges of an image, are excluded (2a-purple outlines). Cellular boundaries are

883 identified (3a-purple outlines), and the nuclear mask is subtracted from the newly  
884 created cellular mask to produce a cytoplasmic mask (3b). The intensity of cytoplasmic  
885 GFP (4a) and RFP (5a) puncta are enhanced, allowing the generation of masks  
886 corresponding to puncta in both channels (4b, 5b) and the identification of  
887 GFP(+)/RFP(+) autophagosomes (6a, b). Scale bar: 50 $\mu$ m. (C) Dose response curves  
888 showing the degree of autophagy inhibition with increasing drug concentrations, plotted  
889 on a log<sub>2</sub> scale. The y-axis represents the proportion of RFP(+) puncta that are GFP(+),  
890 with the maximum and minimum set to 1.0 and 0, respectively. Dots represent individual  
891 technical replicates. (D) RFP-GFP-LC3 HeLa cells were imaged, treated with the lowest  
892 dose that produced the maximum response as calculated in (C), then imaged again 0, 4,  
893 8 and 12h after drug treatment. (E) Normalized data from (D), depicting the time to  
894 maximal effect for each compound. Data in (D, E) represent mean  $\pm$  SEM from 3  
895 biological replicates, 8 technical replicates each.

896

897

898 **Figure S5: Intrinsic fluorescence confounds flux estimates in a subset of**  
899 **Maybridge library hits**

900 Unmodified HEK293T cells were treated with each compound that registered as an  
901 autophagy inhibitor in the screen of the Maybridge 24K library (Fig. 6) Images were  
902 acquired in the GFP and TRITC channels 9H after treatment of each drug at either 10 $\mu$ M  
903 or 80 $\mu$ M. Images are pseudocolored to accentuate intensity differences. For compounds  
904 1 and 5, 80 $\mu$ M images are presented at higher brightness settings to emphasize low  
905 levels of intrinsic fluorescence. All other images are presented at equivalent brightness  
906 and contrast. Scale Bar=50 $\mu$ m (B) Dose response relationships for each drug in the  
907 Dendra-LC3 HEK293T (black), HeLa RFP-GFP-LC3 (blue) autophagic flux assays, as  
908 well as intrinsic fluorescence in the GFP (green) and TRITC (red) channels in  
909 unmodified HEK cells. In Dendra2-LC3 HEK293T cells the maximum effect represents  
910 the greatest increase in RFP intensity 14h after drug treatment. In RFP-GFP-LC3 HeLa  
911 cells the effect represents the proportion RFP(+) puncta that are GFP(+), with the  
912 maximum and minimum set to 1.0 and 0, respectively. For unlabeled HEK293T cells the  
913 maximum fluorescence intensity observed 9H after drug treatment was set to 1 and the  
914 lowest to 0. Concentration is plotted in nM on a log(2) scale, with  $\geq$  3 replicate wells for  
915 each concentration shown as colored dots. Dotted vertical lines correspond to 10 $\mu$ M,  
916 which is the concentration the compounds were initially screened at.

917

918 **Figure S6: Primary cortical and spinal neurons display subtly different rates of**  
919 **autophagic flux.**

920 (A) Histogram depicting single cell Dendra2-LC3 half-lives in cortical and spinal neurons.  
921 Relative to spinal neurons (n=1043), a leftward shift was observed in the Dendra2-LC3  
922 half-life distribution of cortical neurons (n=4058) indicating a greater frequency of cortical  
923 neurons exhibiting high rates of autophagic flux compared to spinal neurons ( $p=8.2 \times 10^{-4}$ ,  
924 two-sample Kolmogorov-Smirnov (KS) test). (B) Consistent with this, the mean single-  
925 cell Dendra2-LC3 half-life was slightly reduced in cortical neurons (33.2h) compared to  
926 spinal neurons (37.1h) ( $p=7.1 \times 10^{-4}$ , Welch two sample t-test), indicating higher rates of  
927 basal autophagy in cortical neurons.

928

929

930 **Supplemental Movie 1: Dendra2-LC3 HEK cells treated with DMSO.**

931 Dendra2-LC3 HEK cells imaged 6 hours after treatment with DMSO. Presented at 3x  
932 actual speed. Scale bar = 10 $\mu$ m

933

934 **Supplemental Movie 2: Dendra2-LC3 HEK cells treated with Torin1.**

935 Dendra2-LC3 HEK cells imaged 6 hours after treatment with 1 $\mu$ M Torin1. Presented at  
936 3x actual speed. Scale bar = 10 $\mu$ m

937

938 **Supplemental Movie 3: Dendra2-LC3 HEK cells treated with Bafilomycin-A1.**

939 Dendra2-LC3 HEK cells imaged 6 hours after treatment with 20nM Bafilomycin-A1.  
940 Presented at 3x actual speed. Scale bar = 10 $\mu$ m

941

942 **Acknowledgements:**

943 This work was supported by the National Institute for Aging (NIA) P30 AG053760, the  
944 University of Michigan Protein Folding Disease Initiative, the Center for Chemical  
945 Genomics (CCG) at the University of Michigan Life Sciences Institute, Michigan Drug  
946 Discovery, and Ann Arbor Active Against ALS. We thank Dr. Vincent Groppi of Michigan  
947 Drug Discovery for his continued support and insights; Dr. Lois Weisman and Prof.  
948 Tamotsu Yoshimori for RFP-GFP-LC3 HeLa cells; and Dr. Paula Gedraitis (Molecular  
949 Devices, LLC) for technical assistance.

950

951

952

953 **Author Contributions:**

954 Conceptualization, N.Safren, S.J.B; Methodology, N.Safren and N.Santoro,

955 Investigation, N.Safren and E.M.T, Writing – Original Draft, N.Safren and S.J.B, Writing

956 – Review and Editing, N.Safren and S.J.B; Funding Acquisition, S.J.B, Resources, S.J.B

957

958 **Citations:**

959 1. Klionsky DJ. Autophagy as a Regulated Pathway of Cellular Degradation. *Science*  
960 (80- ). 2000;290(5497):1717-1721. doi:10.1126/science.290.5497.1717

961 2. Gatica D, Lahiri V, Klionsky DJ. Cargo recognition and degradation by selective  
962 autophagy. 2018. doi:10.1038/s41556-018-0037-z

963 3. Akematsu T, Akporiaye ET, Al-rubeai M, et al. Guidelines for the use and  
964 interpretation of assays for monitoring autophagy (3rd edition). *Autophagy*.  
965 2016;12(February):1-222. doi:10.1080/15548627.2015.1100356

966 4. Qu X, Yu J, Bhagat G, et al. Promotion of tumorigenesis by heterozygous  
967 disruption of the beclin 1 autophagy gene. *J Clin Invest*. 2003;112(12):1809-1820.  
968 doi:10.1172/JCI20039

969 5. Yue Z, Jin S, Yang C, Levine AJ, Heintz N. Beclin 1, an autophagy gene essential  
970 for early embryonic development, is a haploinsufficient tumor suppressor. *Proc*  
971 *Natl Acad Sci*. 2003;100(25):15077-15082. doi:10.1073/pnas.2436255100

972 6. Komatsu M, Waguri S, Ueno T, et al. Impairment of starvation-induced and  
973 constitutive autophagy in *Atg7* -deficient mice. *J Cell Biol*. 2005;169(3):425-434.  
974 doi:10.1083/jcb.200412022

975 7. Galluzzi L, Bravo-San Pedro JM, Levine B, Green DR, Kroemer G.  
976 Pharmacological modulation of autophagy: Therapeutic potential and persisting  
977 obstacles. *Nat Rev Drug Discov*. 2017;16(7):487-511. doi:10.1038/nrd.2017.22

978 8. Rao S, Tortola L, Perlot T, et al. A dual role for autophagy in a murine model of  
979 lung cancer. *Nat Commun*. 2014;5(1):3056. doi:10.1038/ncomms4056

980 9. Rosenfeldt MT, O'Prey J, Morton JP, et al. p53 status determines the role of  
981 autophagy in pancreatic tumour development. *Nature*. 2013;504(7479):296-300.  
982 doi:10.1038/nature12865

983 10. Galluzzi L, Bravo-San Pedro JM, Demaria S, Formenti SC, Kroemer G. Activating  
984 autophagy to potentiate immunogenic chemotherapy and radiation therapy. *Nat*  
985 *Rev Clin Oncol*. 2017;14(4):247-258. doi:10.1038/nrclinonc.2016.183

986 11. Guo JY, Xia B, White E. Autophagy-mediated tumor promotion. *Cell*.  
987 2013;155(6):1216-1219. doi:10.1016/j.cell.2013.11.019

988 12. Komatsu M, Wang QJ, Holstein GR, et al. Essential role for autophagy protein  
989 Atg7 in the maintenance of axonal homeostasis and the prevention of axonal  
990 degeneration. *Proc Natl Acad Sci U S A*. 2007;104(36):14489-14494.  
991 doi:10.1073/pnas.0701311104

992 13. Hara T, Nakamura K, Matsui M, et al. Suppression of basal autophagy in neural  
993 cells causes neurodegenerative disease in mice. *Nature*. 2006;441(7095):885-  
994 889. doi:10.1038/nature04724

995 14. Joo JH, Wang B, Frankel E, et al. The Noncanonical Role of ULK/ATG1 in ER-to-  
996 Golgi Trafficking Is Essential for Cellular Homeostasis. *Mol Cell*. 2016;62(4):491-  
997 506. doi:10.1016/J.MOLCEL.2016.04.020

- 998 15. Liang C-C, Wang C, Peng X, Gan B, Guan J-L. Neural-specific deletion of FIP200  
999 leads to cerebellar degeneration caused by increased neuronal death and axon  
1000 degeneration. *J Biol Chem.* 2010;285(5):3499-3509.  
1001 doi:10.1074/jbc.M109.072389
- 1002 16. Nishiyama J, Miura E, Mizushima N, Watanabe M, Yuzaki M. Aberrant  
1003 Membranes and Double-Membrane Structures Accumulate in the Axons of *Atg5* -  
1004 Null Purkinje Cells before Neuronal Death. *Autophagy.* 2007;3(6):591-596.  
1005 doi:10.4161/auto.4964
- 1006 17. Menzies FM, Fleming A, Caricasole A, et al. Autophagy and Neurodegeneration:  
1007 Pathogenic Mechanisms and Therapeutic Opportunities. *Neuron.*  
1008 2017;93(5):1015-1034. doi:10.1016/j.neuron.2017.01.022
- 1009 18. Pickford F, Masliah E, Britschgi M, et al. The autophagy-related protein beclin 1  
1010 shows reduced expression in early Alzheimer disease and regulates amyloid  $\beta$   
1011 accumulation in mice. *J Clin Invest.* May 2008. doi:10.1172/JCI33585
- 1012 19. Wong E, Cuervo AM. Autophagy gone awry in neurodegenerative diseases. *Nat*  
1013 *Neurosci.* 2010;13(7):805-811. doi:10.1038/nn.2575
- 1014 20. Ramirez A, Heimbach A, Gründemann J, et al. Hereditary parkinsonism with  
1015 dementia is caused by mutations in *ATP13A2*, encoding a lysosomal type 5 P-  
1016 type ATPase. *Nat Genet.* 2006;38(10):1184-1191. doi:10.1038/ng1884
- 1017 21. Kitada T, Asakawa S, Hattori N, et al. Mutations in the parkin gene cause  
1018 autosomal recessive juvenile parkinsonism. *Nature.* 1998;392(6676):605-608.  
1019 doi:10.1038/33416
- 1020 22. Valente EM, Abou-Sleiman PM, Caputo V, et al. Hereditary early-onset  
1021 Parkinson's disease caused by mutations in *PINK1*. *Science.*  
1022 2004;304(5674):1158-1160. doi:10.1126/science.1096284
- 1023 23. Tanik SA, Schultheiss CE, Volpicelli-Daley LA, Brunden KR, Lee VMY. Lewy  
1024 body-like  $\alpha$ -synuclein aggregates resist degradation and impair macroautophagy.  
1025 *J Biol Chem.* 2013;288(21):15194-15210. doi:10.1074/jbc.M113.457408
- 1026 24. Martinez-Vicente M, Talloczy Z, Wong E, et al. Cargo recognition failure is  
1027 responsible for inefficient autophagy in Huntington's disease. *Nat Neurosci.*  
1028 2010;13(5):567-576. doi:10.1038/nn.2528
- 1029 25. Ashkenazi A, Bento CF, Ricketts T, et al. Polyglutamine tracts regulate beclin 1-  
1030 dependent autophagy. *Nature.* 2017;545(7652):108-111.  
1031 doi:10.1038/nature22078
- 1032 26. Wong YC, Holzbaur ELF. The Regulation of Autophagosome Dynamics by  
1033 Huntingtin and HAP1 Is Disrupted by Expression of Mutant Huntingtin, Leading to  
1034 Defective Cargo Degradation. *J Neurosci.* 2014;34(4):1293-1305.  
1035 doi:10.1523/JNEUROSCI.1870-13.2014
- 1036 27. Nguyen DKH, Thombre R, Wang J. Autophagy as a common pathway in  
1037 amyotrophic lateral sclerosis. *Neurosci Lett.* April 2018.  
1038 doi:10.1016/J.NEULET.2018.04.006
- 1039 28. Pottier C, Bieniek KF, Finch N, et al. Whole-genome sequencing reveals  
1040 important role for *TBK1* and *OPTN* mutations in frontotemporal lobar degeneration  
1041 without motor neuron disease. *Acta Neuropathol.* 2015;130(1):77-92.  
1042 doi:10.1007/s00401-015-1436-x
- 1043 29. Gijssels I, Van Mossevelde S, van der Zee J, et al. Loss of *TBK1* is a frequent  
1044 cause of frontotemporal dementia in a Belgian cohort. *Neurology.*  
1045 2015;85(24):2116-2125. doi:10.1212/WNL.0000000000002220
- 1046 30. Le Ber I, Camuzat A, Guerreiro R, et al. *SQSTM1* Mutations in French Patients  
1047 With Frontotemporal Dementia or Frontotemporal Dementia With Amyotrophic  
1048 Lateral Sclerosis. *JAMA Neurol.* 2013;70(11):1403-1410.

- 1049 doi:10.1001/jamaneurol.2013.3849
- 1050 31. Synofzik M, Maetzler W, Grehl T, et al. Screening in ALS and FTD patients  
1051 reveals 3 novel UBQLN2 mutations outside the PXX domain and a pure FTD  
1052 phenotype. *Neurobiol Aging*. 2012;33(12):2949.e13-2949.e17.  
1053 doi:10.1016/j.neurobiolaging.2012.07.002
- 1054 32. Teysou E, Takeda T, Lebon V, et al. Mutations in SQSTM1 encoding p62 in  
1055 amyotrophic lateral sclerosis: genetics and neuropathology. *Acta Neuropathol*.  
1056 2013;125(4):511-522. doi:10.1007/s00401-013-1090-0
- 1057 33. Maruyama H, Morino H, Ito H, et al. Mutations of optineurin in amyotrophic lateral  
1058 sclerosis. *Nature*. 2010;465(7295):223-226. doi:10.1038/nature08971
- 1059 34. DeJesus-Hernandez M, Mackenzie IR, Boeve BF, et al. Expanded GGGGCC  
1060 Hexanucleotide Repeat in Noncoding Region of C9ORF72 Causes Chromosome  
1061 9p-Linked FTD and ALS. *Neuron*. 2011;72(2):245-256.  
1062 doi:10.1016/J.NEURON.2011.09.011
- 1063 35. Renton AE, Majounie E, Waite A, et al. A Hexanucleotide Repeat Expansion in  
1064 C9ORF72 Is the Cause of Chromosome 9p21-Linked ALS-FTD. *Neuron*.  
1065 2011;72(2):257-268. doi:10.1016/j.neuron.2011.09.010
- 1066 36. Cirulli ET, Lasseigne BN, Petrovski S, et al. Exome sequencing in amyotrophic  
1067 lateral sclerosis identifies risk genes and pathways. *Science (80- )*.  
1068 2015;347(6229):1436-1441. doi:10.1126/SCIENCE.AAA3650
- 1069 37. Deng H-X, Chen W, Hong S-T, et al. Mutations in UBQLN2 cause dominant X-  
1070 linked juvenile and adult-onset ALS and ALS/dementia. *Nature*.  
1071 2011;477(7363):211-215. doi:10.1038/nature10353
- 1072 38. Florey O, Gammoh N, Kim SE, Jiang X, Overholtzer M. V-ATPase and osmotic  
1073 imbalances activate endolysosomal LC3 lipidation. *Autophagy*. 2015;11(1):88-99.  
1074 doi:10.4161/15548627.2014.984277
- 1075 39. Zoncu R, Bar-Peled L, Efeyan A, Wang S, Sancak Y, Sabatini DM. mTORC1  
1076 senses lysosomal amino acids through an inside-out mechanism that requires the  
1077 vacuolar H(+)-ATPase. *Science*. 2011;334(6056):678-683.  
1078 doi:10.1126/science.1207056
- 1079 40. Barmada SJ, Serio A, Arjun A, et al. Autophagy induction enhances TDP43  
1080 turnover and survival in neuronal ALS models. *Nat Chem Biol*. 2014;10(8):677-  
1081 685. doi:10.1038/nchembio.1563
- 1082 41. Chudakov DM, Lukyanov S, Lukyanov KA. Tracking intracellular protein  
1083 movements using photoswitchable fluorescent proteins PS-CFP2 and Dendra2.  
1084 *Nat Protoc*. 2007;2(8):2024-2032. doi:10.1038/nprot.2007.291
- 1085 42. Meijer AJ, Lorin S, Blommaert EF, Codogno P. Regulation of autophagy by amino  
1086 acids and MTOR-dependent signal transduction. *Amino Acids*. 2015;47(10):2037-  
1087 2063. doi:10.1007/s00726-014-1765-4
- 1088 43. Wolfson RL, Sabatini DM. Cell Metabolism The Dawn of the Age of Amino Acid  
1089 Sensors for the mTORC1 Pathway. *Cell Metab*. 2017;26:301-309.  
1090 doi:10.1016/j.cmet.2017.07.001
- 1091 44. Kocaturk NM, Gozuacik D. Crosstalk Between Mammalian Autophagy and the  
1092 Ubiquitin-Proteasome System. *Front Cell Dev Biol*. 2018;6:128.  
1093 doi:10.3389/fcell.2018.00128
- 1094 45. Mali P, Yang L, Esvelt KM, et al. RNA-guided human genome engineering via  
1095 Cas9. *Science*. 2013;339(6121):823-826. doi:10.1126/science.1232033
- 1096 46. Ran FA, Hsu PD, Lin C-Y, et al. Double nicking by RNA-guided CRISPR Cas9 for  
1097 enhanced genome editing specificity. *Cell*. 2013;154(6):1380-1389.  
1098 doi:10.1016/j.cell.2013.08.021
- 1099 47. Thoreen CC, Kang SA, Chang JW, et al. An ATP-competitive mammalian target

- 1100 of rapamycin inhibitor reveals rapamycin-resistant functions of mTORC1. *J Biol*  
1101 *Chem.* 2009;284(12):8023-8032. doi:10.1074/jbc.M900301200
- 1102 48. Maday S, Wallace KE, Holzbaur ELF. Autophagosomes initiate distally and  
1103 mature during transport toward the cell soma in primary neurons. *J Cell Biol.*  
1104 2012;196(4):407-417. doi:10.1083/jcb.201106120
- 1105 49. Mizushima N, Yamamoto A, Hatano M, et al. Dissection of autophagosome  
1106 formation using Apg5-deficient mouse embryonic stem cells. *J Cell Biol.*  
1107 2001;152(4):657-668. <http://www.ncbi.nlm.nih.gov/pubmed/11266458>. Accessed  
1108 March 21, 2019.
- 1109 50. Liu Q, Kang SA, Thoreen CC, et al. Development of ATP-competitive mTOR  
1110 inhibitors. *Methods Mol Biol.* 2012;821:447-460. doi:10.1007/978-1-61779-430-  
1111 8\_29
- 1112 51. Tsvetkov AS, Miller J, Arrasate M, Wong JS, Pleiss MA, Finkbeiner S. A small-  
1113 molecule scaffold induces autophagy in primary neurons and protects against  
1114 toxicity in a Huntington disease model. *Proc Natl Acad Sci U S A.*  
1115 2010;107(39):16982-16987. doi:10.1073/pnas.1004498107
- 1116 52. Balgi AD, Fonseca BD, Donohue E, et al. Screen for chemical modulators of  
1117 autophagy reveals novel therapeutic inhibitors of mTORC1 signaling. *PLoS One.*  
1118 2009;4(9). doi:10.1371/journal.pone.0007124
- 1119 53. Akar U, Ozpolat B, Mehta K, Fok J, Kondo Y, Lopez-Berestein G. Tissue  
1120 transglutaminase inhibits autophagy in pancreatic cancer cells. *Mol Cancer Res.*  
1121 2007;5(3):241-249. doi:10.1158/1541-7786.MCR-06-0229
- 1122 54. Watanabe-Asano T, Kuma A, Mizushima N. Cycloheximide inhibits starvation-  
1123 induced autophagy through mTORC1 activation. *Biochem Biophys Res Commun.*  
1124 2014;445(2):334-339. doi:10.1016/j.bbrc.2014.01.180
- 1125 55. Shakeri A, Cicero AFG, Panahi Y, Mohajeri M, Sahebkar A. Curcumin: A naturally  
1126 occurring autophagy modulator. *J Cell Physiol.* 2019;234(5):5643-5654.  
1127 doi:10.1002/jcp.27404
- 1128 56. Chignell CF, Bilski P, Reszka KJ, Motten AG, Sik RH, Dahl TA. Spectral and  
1129 photochemical properties of curcumin. *Photochem Photobiol.* 1994;59(3):295-302.  
1130 <http://www.ncbi.nlm.nih.gov/pubmed/8016208>. Accessed August 6, 2019.
- 1131 57. Aldrich LN, Goel G, Lassen KG, et al. Small-molecule enhancers of autophagy  
1132 modulate cellular disease phenotypes suggested by human genetics. *Proc Natl*  
1133 *Acad Sci.* 2015;112(31):E4281-E4287. doi:10.1073/pnas.1512289112
- 1134 58. Bhaskar K, Timmins GS, Arko-Mensah J, et al. Pharmaceutical screen identifies  
1135 novel target processes for activation of autophagy with a broad translational  
1136 potential. *Nat Commun.* 2015;6(1):1-15. doi:10.1038/ncomms9620
- 1137 59. Kimura S, Noda T, Yoshimori T. Dissection of the autophagosome maturation  
1138 process by a novel reporter protein, tandem fluorescent-tagged LC3. *Autophagy.*  
1139 3(5):452-460. <http://www.ncbi.nlm.nih.gov/pubmed/17534139>. Accessed March  
1140 22, 2019.
- 1141 60. Gupta A, Roy S, Lazar AJF, et al. Autophagy inhibition and antimalarials promote  
1142 cell death in gastrointestinal stromal tumor (GIST). *Proc Natl Acad Sci U S A.*  
1143 2010;107(32):14333-14338. doi:10.1073/pnas.1000248107
- 1144 61. Arrasate M, Finkbeiner S. Automated microscope system for determining factors  
1145 that predict neuronal fate. *Proc Natl Acad Sci U S A.* 2005;102(10):3840-3845.  
1146 doi:10.1073/pnas.0409777102
- 1147 62. Weskamp K, Safren N, Miguez R, Barmada S. Monitoring Neuronal Survival via  
1148 Longitudinal Fluorescence Microscopy. *J Vis Exp.* 2019;(143). doi:10.3791/59036
- 1149 63. Malik AM, Miguez RA, Li X, Ho YS, Feldman EL, Barmada SJ. Matrin 3-  
1150 dependent neurotoxicity is modified by nucleic acid binding and

- 1151 nucleocytoplasmic localization. *Elife*. 2018;7:1-30. doi:10.7554/eLife.35977
- 1152 64. Christensen E. Special Articles Multivariate Survival Analysis Using Cox's
- 1153 Regression Model. *Liver*. 1987;7(6):1346-1358.
- 1154 65. Neumann M, Sampathu DM, Kwong LK, et al. Ubiquitinated TDP-43 in
- 1155 frontotemporal lobar degeneration and amyotrophic lateral sclerosis. *Science*.
- 1156 2006;314(5796):130-133. doi:10.1126/science.1134108
- 1157 66. Lee EB, Lee VM-Y, Trojanowski JQ. Gains or losses: molecular mechanisms of
- 1158 TDP43-mediated neurodegeneration. *Nat Rev Neurosci*. 2012;13(1):38-50.
- 1159 doi:10.1038/nrn3121
- 1160 67. Barmada SJ, Skibinski G, Korb E, Rao EJ, Wu JY, Finkbeiner S. Cytoplasmic
- 1161 mislocalization of TDP-43 is toxic to neurons and enhanced by a mutation
- 1162 associated with familial amyotrophic lateral sclerosis. *J Neurosci*. 2010;30(2):639-
- 1163 649. doi:10.1523/JNEUROSCI.4988-09.2010
- 1164 68. Flores BN, Li X, Malik AM, Martinez J, Beg AA, Barmada SJ. An Intramolecular
- 1165 Salt Bridge Linking TDP43 RNA Binding, Protein Stability, and TDP43-Dependent
- 1166 Neurodegeneration. *Cell Rep*. 2019;27(4):1133-1150.e8.
- 1167 doi:10.1016/j.celrep.2019.03.093
- 1168 69. Kodama A, Kaizuka T, Ishihara T, et al. An Autophagic Flux Probe that Releases
- 1169 an Internal Control. *Mol Cell*. 2016;64(4):835-849.
- 1170 doi:10.1016/j.molcel.2016.09.037
- 1171 70. Eguchi Y, Makanae K, Hasunuma T, Ishibashi Y, Kito K, Moriya H. Estimating the
- 1172 protein burden limit of yeast cells by measuring the expression limits of glycolytic
- 1173 proteins. *Elife*. 2018;7:1-3. doi:10.7554/eLife.34595
- 1174 71. Moriya H. Quantitative nature of overexpression experiments. *Mol Biol Cell*.
- 1175 2015;26(22):3932-3939. doi:10.1091/mbc.E15-07-0512
- 1176 72. Bolognesi B, Lorenzo Gotor N, Dhar R, et al. A Concentration-Dependent Liquid
- 1177 Phase Separation Can Cause Toxicity upon Increased Protein Expression. *Cell*
- 1178 *Rep*. 2016;16(1):222-231. doi:10.1016/j.celrep.2016.05.076
- 1179 73. Rudnick ND, Griffey CJ, Guarnieri P, et al. Distinct roles for motor neuron
- 1180 autophagy early and late in the SOD1<sup>G93A</sup> mouse model of ALS. *Proc Natl Acad*
- 1181 *Sci*. 2017;114(39):E8294-E8303. doi:10.1073/pnas.1704294114
- 1182 74. Panicker LM, Sarkar C, Sgambato JA, et al. Altered TFEB-mediated lysosomal
- 1183 biogenesis in Gaucher disease iPSC-derived neuronal cells. *Hum Mol Genet*.
- 1184 2015;24(20):5775-5788. doi:10.1093/hmg/ddv297
- 1185 75. Leestemaker Y, de Jong A, Witting KF, et al. Proteasome Activation by Small
- 1186 Molecules. *Cell Chem Biol*. 2017;24(6):725-736.e7.
- 1187 doi:10.1016/J.CHEMBIOL.2017.05.010
- 1188 76. Tanaka M, Machida Y, Niu S, et al. Trehalose alleviates polyglutamine-mediated
- 1189 pathology in a mouse model of Huntington disease. *Nat Med*. 2004;10(2):148-
- 1190 154. doi:10.1038/nm985
- 1191 77. Sarkar S, Davies JE, Huang Z, Tunnacliffe A, Rubinsztein DC. Trehalose, a novel
- 1192 mTOR-independent autophagy enhancer, accelerates the clearance of mutant
- 1193 huntingtin and alpha-synuclein. *J Biol Chem*. 2007;282(8):5641-5652.
- 1194 doi:10.1074/jbc.M609532200
- 1195 78. Alers S, Löffler AS, Wesselborg S, Stork B. Role of AMPK-mTOR-Ulk1/2 in the
- 1196 regulation of autophagy: cross talk, shortcuts, and feedbacks. *Mol Cell Biol*.
- 1197 2012;32(1):2-11. doi:10.1128/MCB.06159-11
- 1198 79. Shi W-Y, Xiao D, Wang L, et al. Therapeutic metformin/AMPK activation blocked
- 1199 lymphoma cell growth via inhibition of mTOR pathway and induction of autophagy.
- 1200 *Cell Death Dis*. 2012;3(3):e275-e275. doi:10.1038/cddis.2012.13
- 1201 80. Tomic T, Botton T, Cerezo M, et al. Metformin inhibits melanoma development



- 1202 through autophagy and apoptosis mechanisms. *Cell Death Dis.* 2011;2(9):e199.  
1203 doi:10.1038/cddis.2011.86
- 1204 81. Yang H, Peng Y-F, Ni H-M, et al. Basal Autophagy and Feedback Activation of  
1205 Akt Are Associated with Resistance to Metformin-Induced Inhibition of Hepatic  
1206 Tumor Cell Growth. Shen H-M, ed. *PLoS One.* 2015;10(6):e0130953.  
1207 doi:10.1371/journal.pone.0130953
- 1208 82. Sarkar S, Floto RA, Berger Z, et al. Lithium induces autophagy by inhibiting  
1209 inositol monophosphatase. *J Cell Biol.* 2005;170(7). doi:10.1083/jcb.200504035
- 1210 83. Zhang L, Wang L, Wang R, et al. Evaluating the Effectiveness of GTM-1,  
1211 Rapamycin, and Carbamazepine on Autophagy and Alzheimer Disease.  
1212 2017;23:801-808. doi:10.12659/MSM.898679
- 1213 84. Wang I-F, Guo B-S, Liu Y-C, et al. Autophagy activators rescue and alleviate  
1214 pathogenesis of a mouse model with proteinopathies of the TAR DNA-binding  
1215 protein 43. *Proc Natl Acad Sci.* 2012;109(37):15024-15029.  
1216 doi:10.1073/pnas.1206362109
- 1217 85. Castillo K, Nassif M, Valenzuela V, et al. Trehalose delays the progression of  
1218 amyotrophic lateral sclerosis by enhancing autophagy in motoneurons.  
1219 *Autophagy.* 2013;9(9):1308-1320. doi:10.4161/auto.25188
- 1220 86. Sarkar S, Chigurupati S, Raymick J, et al. Neuroprotective effect of the chemical  
1221 chaperone, trehalose in a chronic MPTP-induced Parkinson's disease mouse  
1222 model. *Neurotoxicology.* 2014;44:250-262. doi:10.1016/j.neuro.2014.07.006
- 1223 87. Yoon YS, Cho ED, Jung Ahn W, Won Lee K, Lee SJ, Lee HJ. Is trehalose an  
1224 autophagic inducer? Unraveling the roles of non-reducing disaccharides on  
1225 autophagic flux and alpha-synuclein aggregation. *Cell Death Dis.*  
1226 2017;8(10):e3091. doi:10.1038/cddis.2017.501
- 1227 88. Lee HJ, Yoon YS, Lee SJ. Mechanism of neuroprotection by trehalose:  
1228 Controversy surrounding autophagy induction. *Cell Death Dis.* 2018;9(7).  
1229 doi:10.1038/s41419-018-0749-9
- 1230 89. Yarasheski KE, Davidson NO, Heitmeier MR, et al. Trehalose inhibits solute  
1231 carrier 2A (SLC2A) proteins to induce autophagy and prevent hepatic steatosis.  
1232 *Sci Signal.* 2016;9(416):ra21-ra21. doi:10.1126/scisignal.aac5472
- 1233 90. Bellozi PMQ, Lima IV de A, Dória JG, et al. Neuroprotective effects of the  
1234 anticancer drug NVP-BE235 (dactolisib) on amyloid- $\beta$  1-42 induced neurotoxicity  
1235 and memory impairment. *Sci Rep.* 2016;6(May):25226. doi:10.1038/srep25226
- 1236 91. Evans CS, Holzbaur ELF. Autophagy and mitophagy in ALS. *Neurobiol Dis.*  
1237 2019;122:35-40. doi:10.1016/j.nbd.2018.07.005
- 1238 92. Valenzuela V, Nassif M, Hetz C. Unraveling the role of motoneuron autophagy in  
1239 ALS. *Autophagy.* 2018;14(4):733-737. doi:10.1080/15548627.2018.1432327
- 1240 93. Zhang X, Li L, Chen S, et al. Rapamycin treatment augments motor neuron  
1241 degeneration in SOD1 G93A mouse model of amyotrophic lateral sclerosis)  
1242 Rapamycin treatment augments motor neuron degeneration in SOD1 G93A  
1243 mouse model of amyotrophic lateral sclerosis. *Autophagy.* 2011;7(4):412-425.  
1244 doi:10.4161/auto.7.4.14541
- 1245 94. Fox JH, Connor T, Chopra V, et al. The mTOR kinase inhibitor Everolimus  
1246 decreases S6 kinase phosphorylation but fails to reduce mutant huntingtin levels  
1247 in brain and is not neuroprotective in the R6/2 mouse model of Huntington's  
1248 disease. *Mol Neurodegener.* 2010;5(1):26. doi:10.1186/1750-1326-5-26
- 1249 95. Maday S, Holzbaur ELF. Compartment-Specific Regulation of Autophagy in  
1250 Primary Neurons. *J Neurosci.* 2016;36(22):5933-5945.  
1251 doi:10.1523/jneurosci.4401-15.2016
- 1252 96. Subach OM, Patterson GH, Ting L-M, Wang Y, Condeelis JS, Verkhusha V V. A

- 1253 photoswitchable orange-to-far-red fluorescent protein, PSmOrange. *Nat Methods*.  
1254 2011;8(9):771-777. doi:10.1038/nmeth.1664
- 1255 97. Archbold HC, Jackson KL, Arora A, et al. TDP43 nuclear export and  
1256 neurodegeneration in models of amyotrophic lateral sclerosis and frontotemporal  
1257 dementia. *Sci Rep*. 2018;8(1):4606. doi:10.1038/s41598-018-22858-w
- 1258 98. Barmada SJ, Ju S, Arjun A, et al. Amelioration of toxicity in neuronal models of  
1259 amyotrophic lateral sclerosis by hUPF1. *Proc Natl Acad Sci*. 2015;112(25):7821-  
1260 7826. doi:10.1073/pnas.1509744112
- 1261 99. Sharkey LM, Safren N, Pithadia AS, et al. Mutant UBQLN2 promotes toxicity by  
1262 modulating intrinsic self-assembly. *Proc Natl Acad Sci*. 2018;115(44):E10495-  
1263 E10504. doi:10.1073/pnas.1810522115
- 1264 100. Tsvetkov AS, Arrasate M, Barmada S, et al. Proteostasis of polyglutamine varies  
1265 among neurons and predicts neurodegeneration. *Nat Chem Biol*. 2013;9(9):586-  
1266 592. doi:10.1038/nchembio.1308
- 1267 101. McQuin C, Goodman A, Chernyshev V, et al. CellProfiler 3.0: Next-generation  
1268 image processing for biology. Misteli T, ed. *PLoS Biol*. 2018;16(7):e2005970.  
1269 doi:10.1371/journal.pbio.2005970  
1270

**Fig. 1**

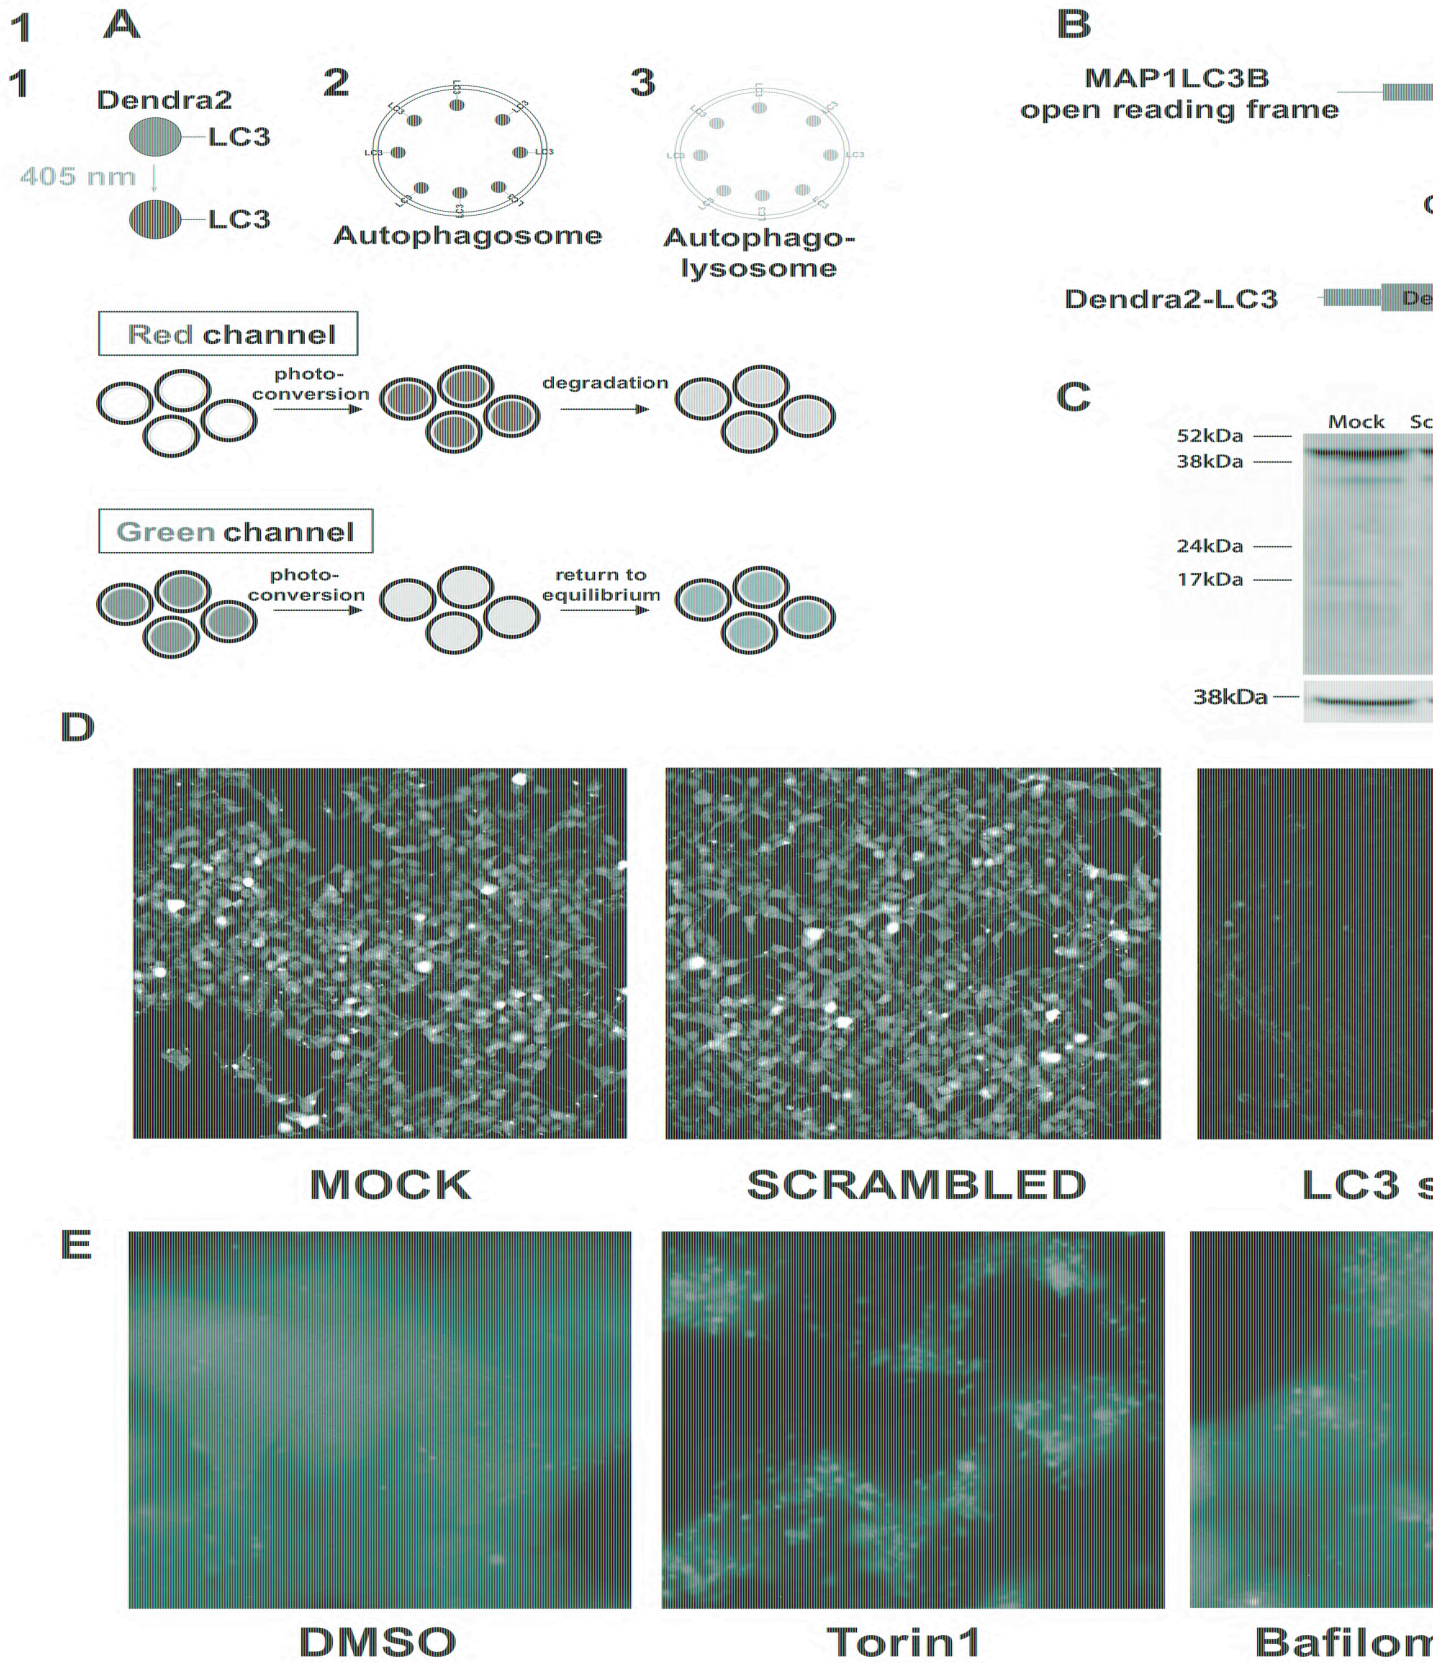

**Fig. 2**

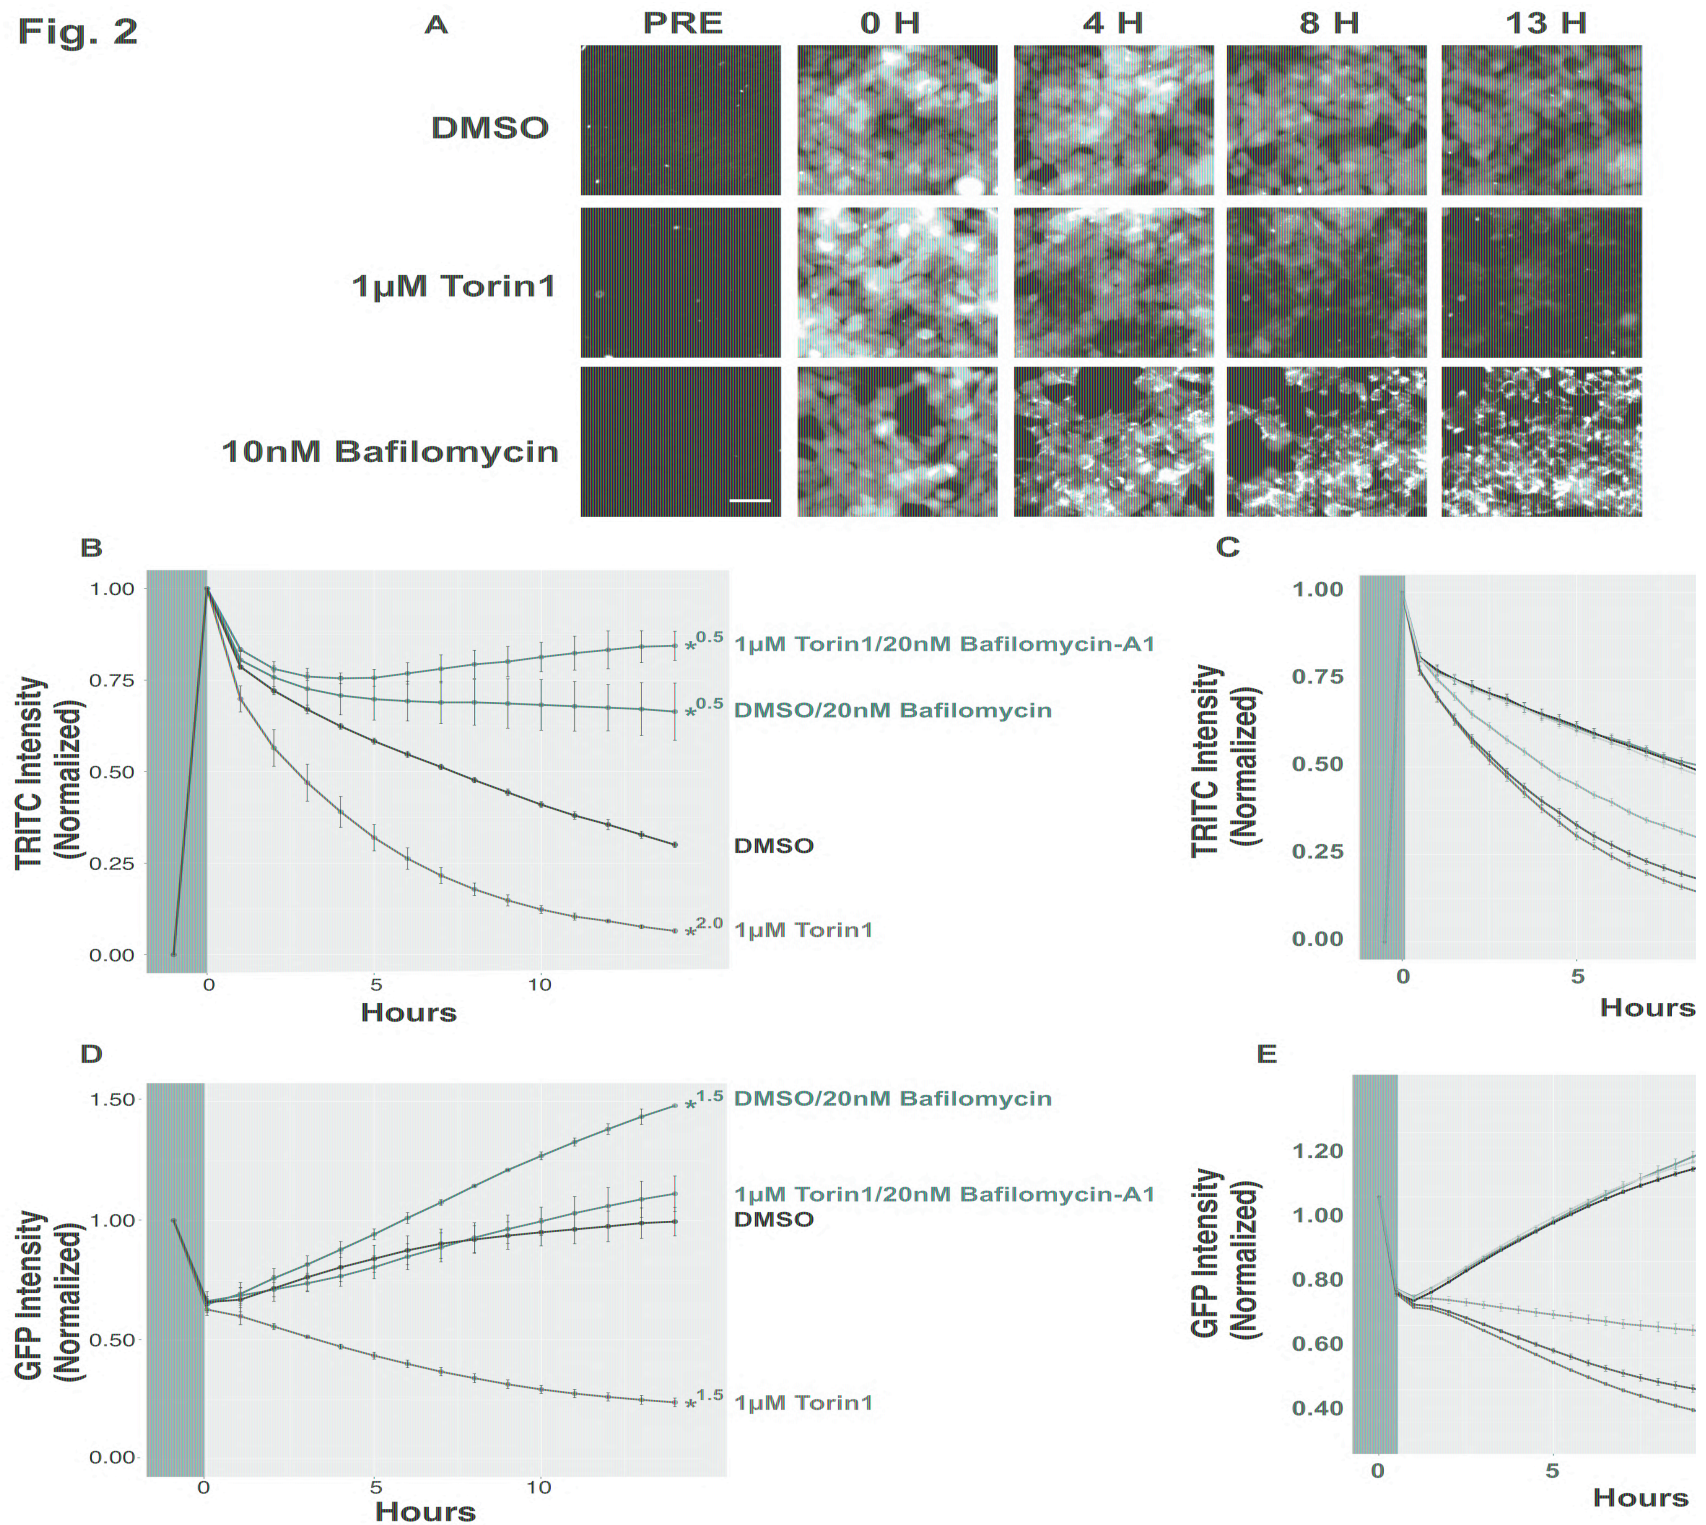

**Fig. 3**

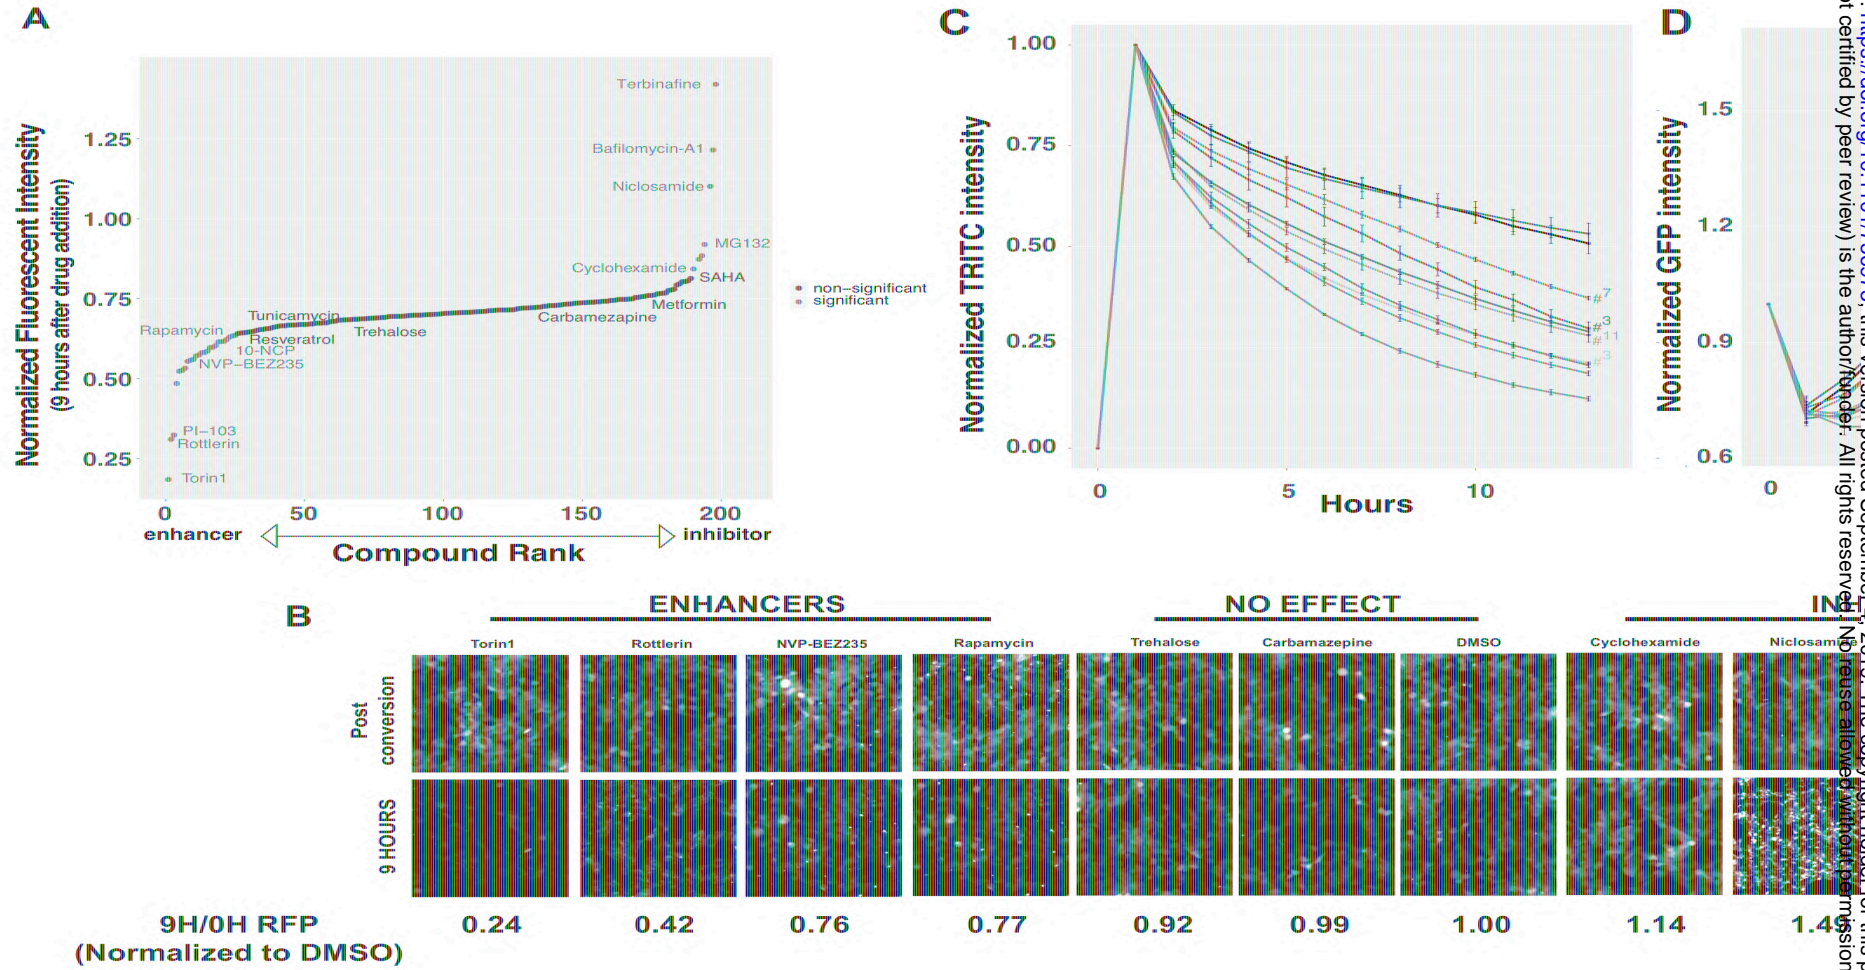

**Fig. 4**

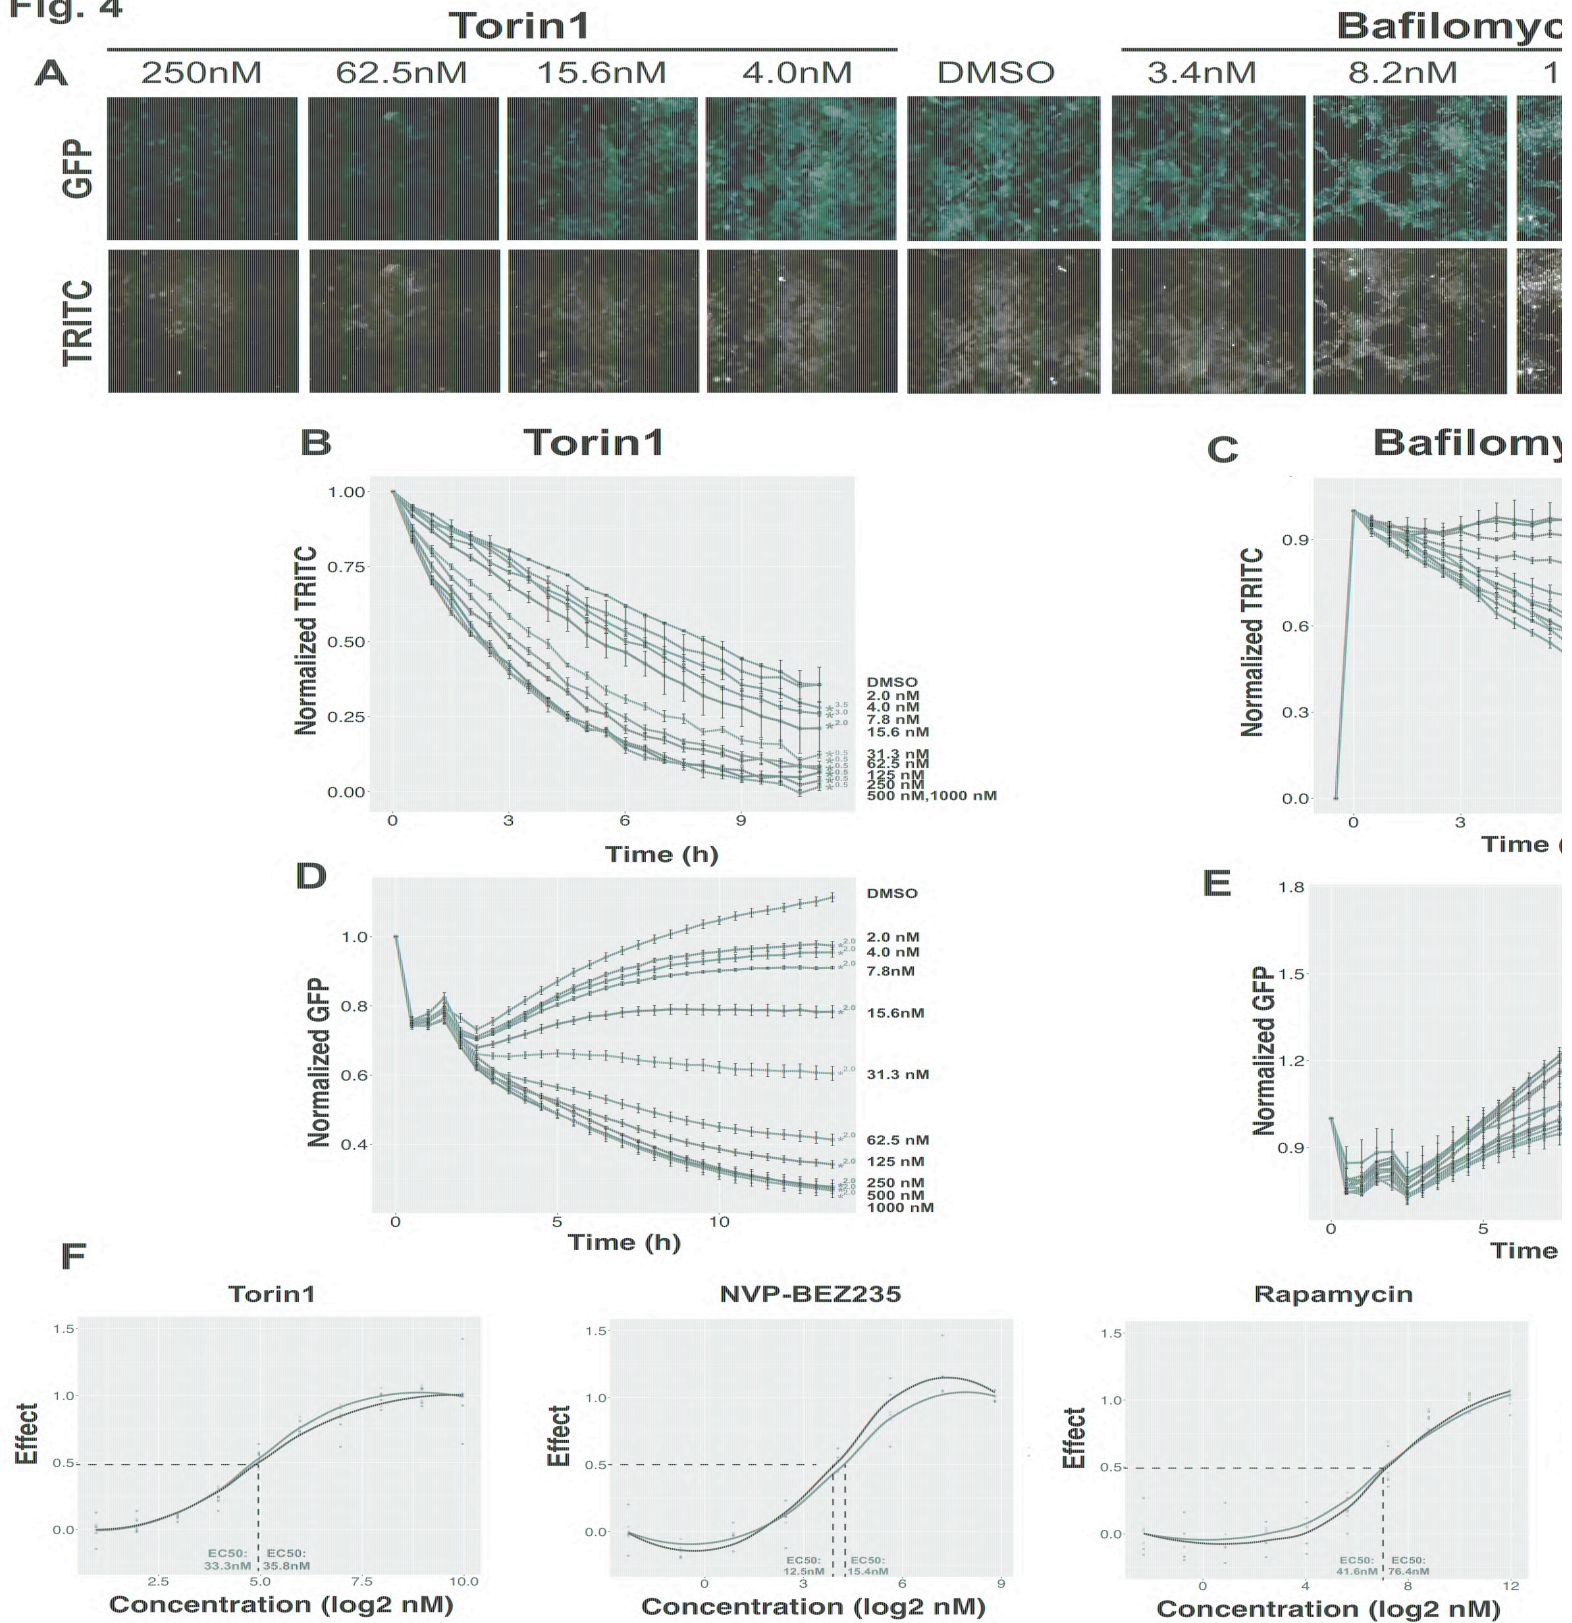

Fig. 5

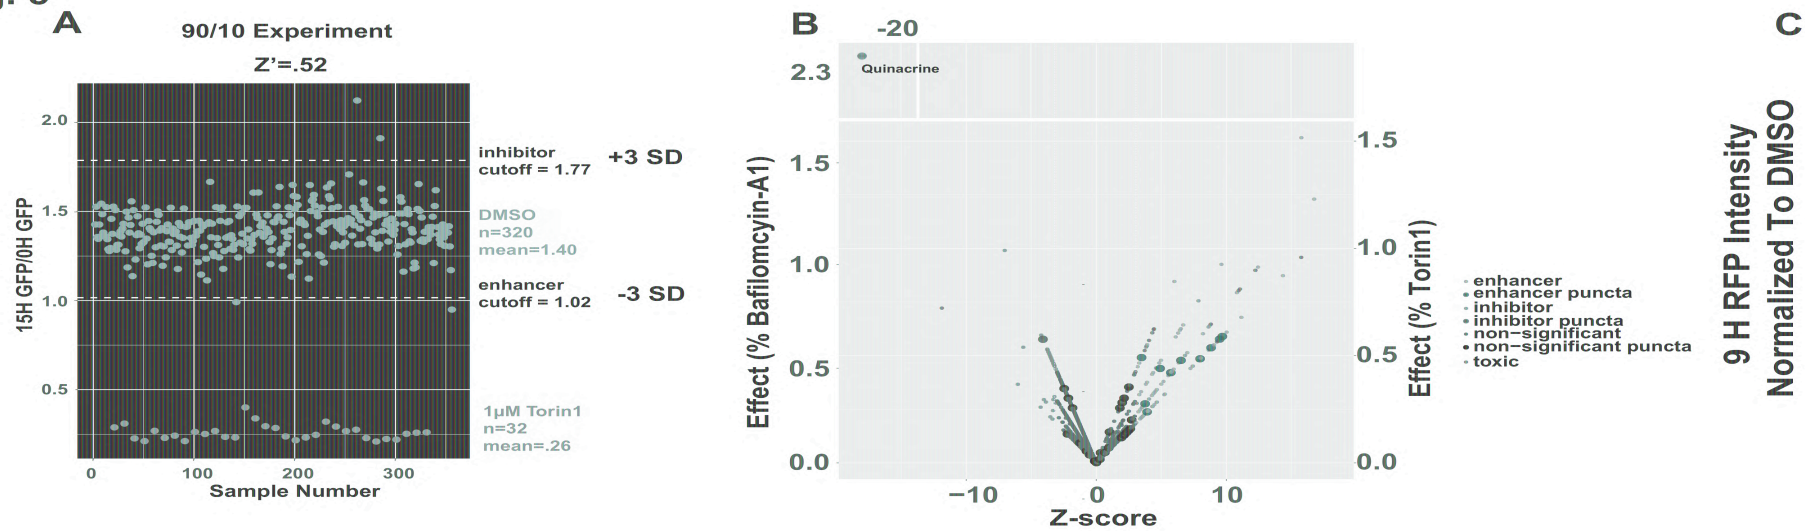

Fig. 6

A

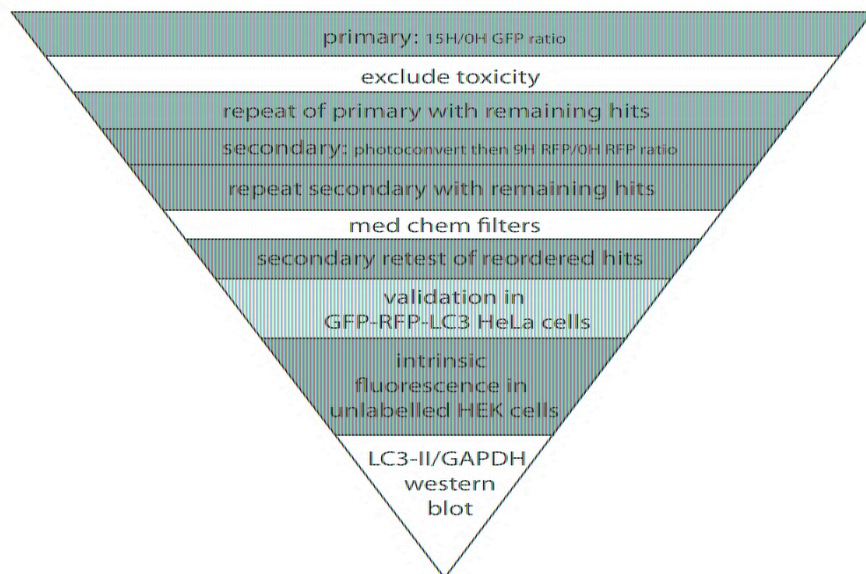

B

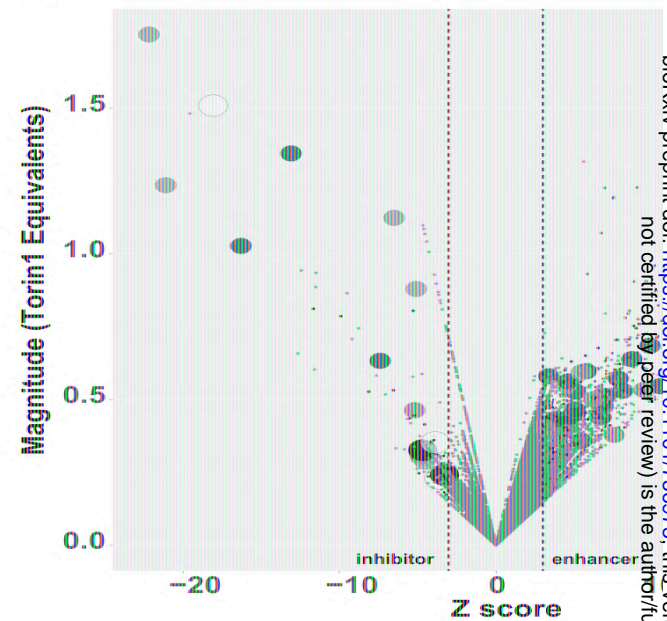

C

| COMPOUND                                                                              | GFP                                                                                 |                                                                                     | RFP                                                                                 |                                                                                     | Reordered                                                                           |                                                                                      | Z-SCORE |      |           |      |       |
|---------------------------------------------------------------------------------------|-------------------------------------------------------------------------------------|-------------------------------------------------------------------------------------|-------------------------------------------------------------------------------------|-------------------------------------------------------------------------------------|-------------------------------------------------------------------------------------|--------------------------------------------------------------------------------------|---------|------|-----------|------|-------|
|                                                                                       | 0H                                                                                  | 15H                                                                                 | 0H                                                                                  | 6H                                                                                  | 0H                                                                                  | 6H                                                                                   | PRIMARY |      | SECONDARY |      |       |
|                                                                                       |                                                                                     |                                                                                     |                                                                                     |                                                                                     |                                                                                     |                                                                                      | INIT    | CONF | INIT      | CONF | FRESH |
| 1 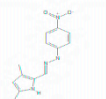   |    |    |    |    |    |    | 3.9     | 5.4  | 36.3      | 28.9 | 9.5   |
| 2  |  |  |  |  |  |  | 3.3     | 6.4  | 19.7      | 15.2 | 10.3  |
| 3  |  |  |  |  |  |  | 4.7     | 15.8 | 10.3      | 19.2 | 20.6  |
| 4  |  |  |  |  |  |  | 3.6     | 3.9  | 3.9       | 3.7  | 4.5   |
| 5  |  |  |  |  |  |  | 18.1    | 23.2 | 3.4       | 3.6  | 3.6   |

D

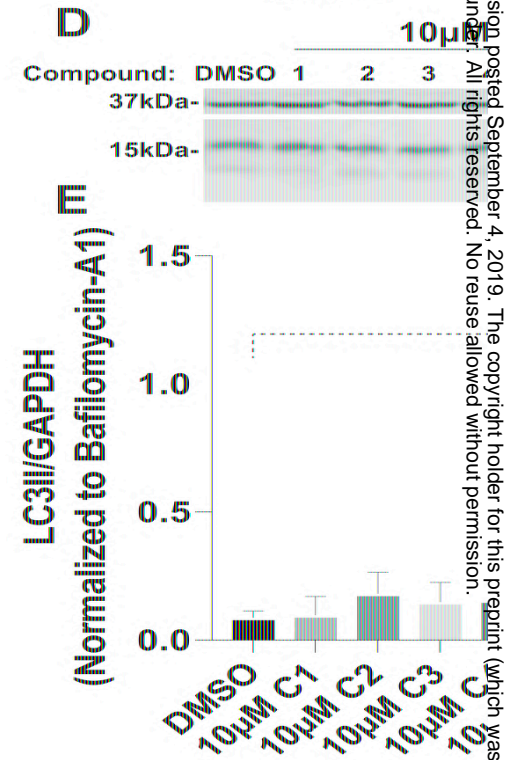



Fig. 7

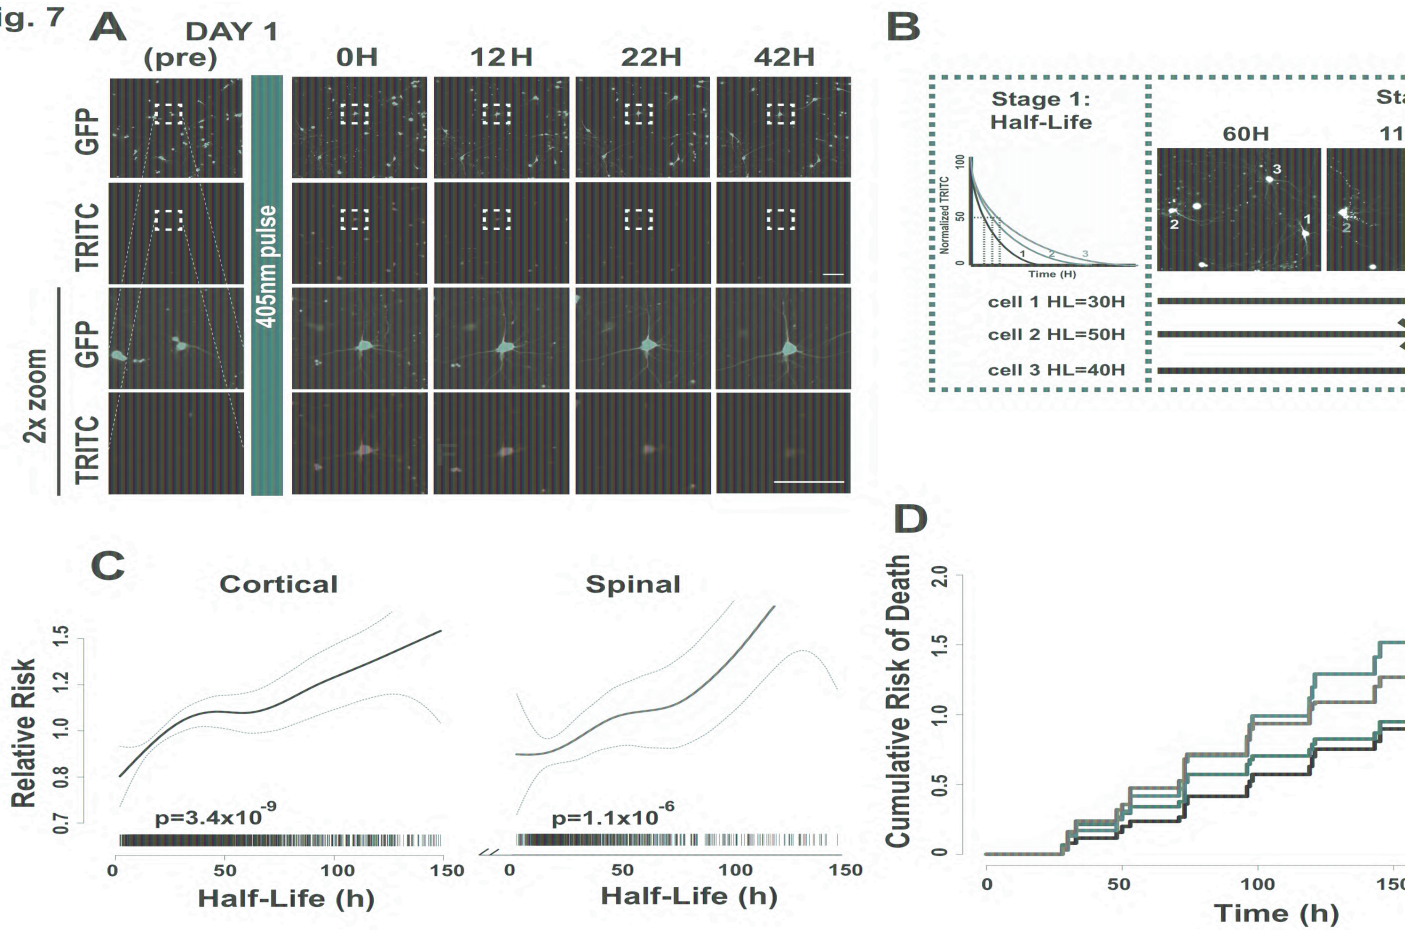

**Fig. S1**

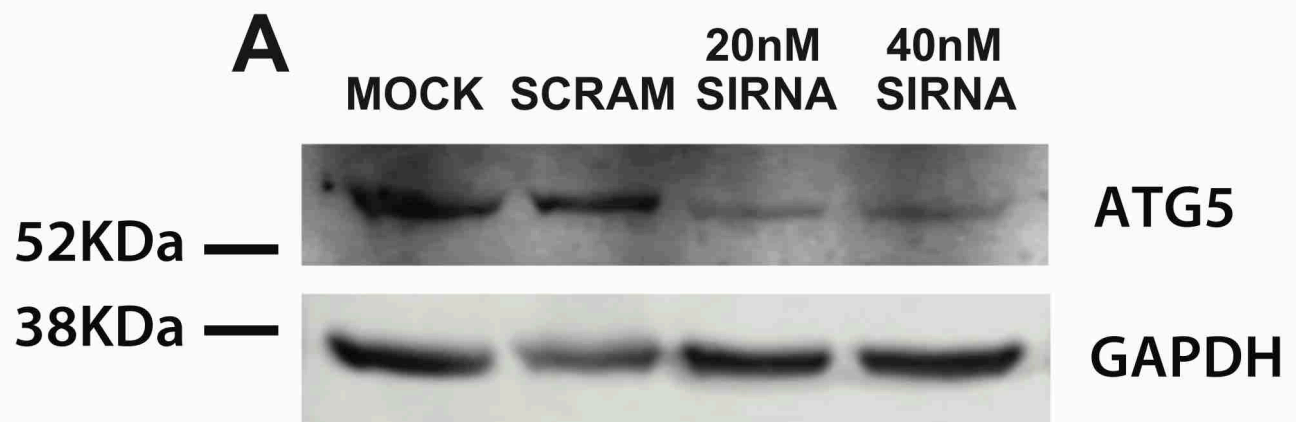

## Fig. S2

Hour: -1

0

3

5

8

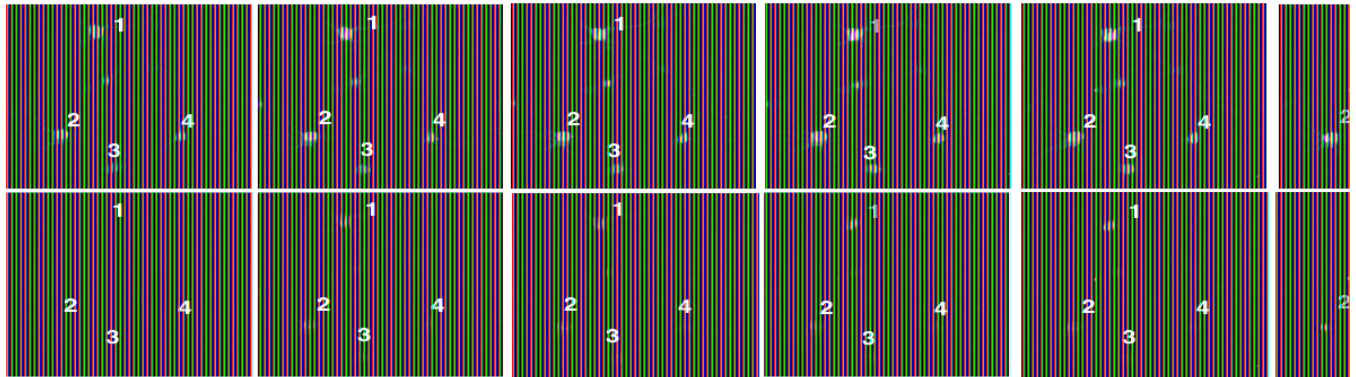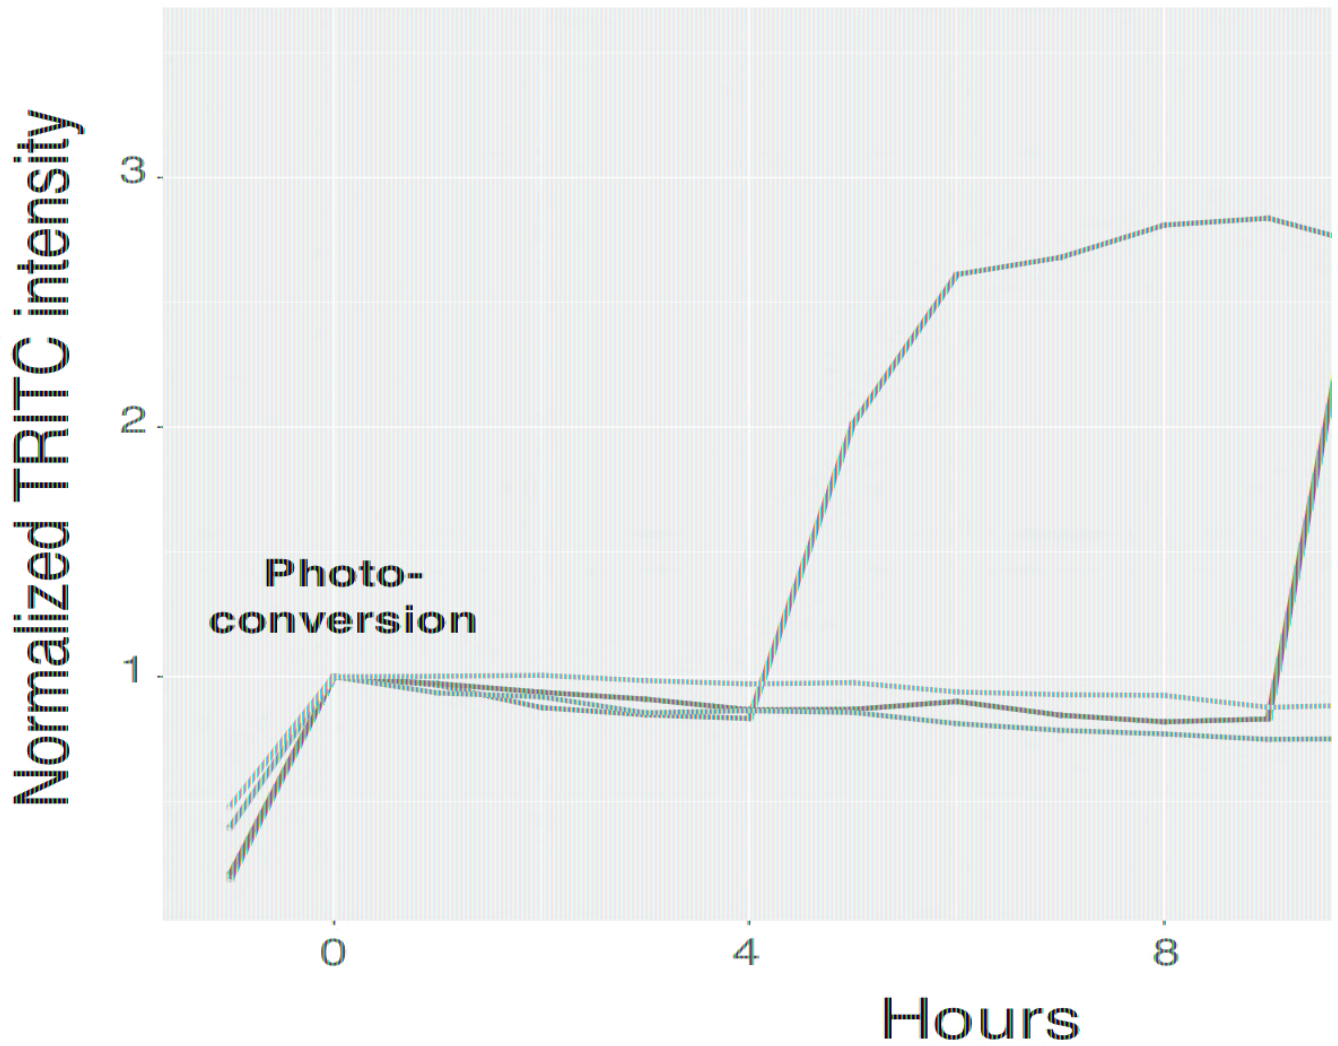

**Fig. S3**

Curcumin

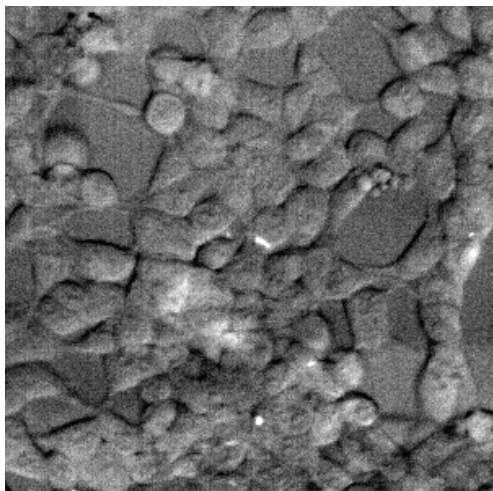

U74389G

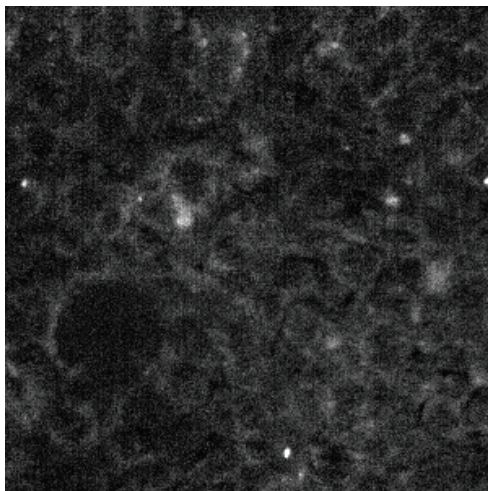

BIM-1

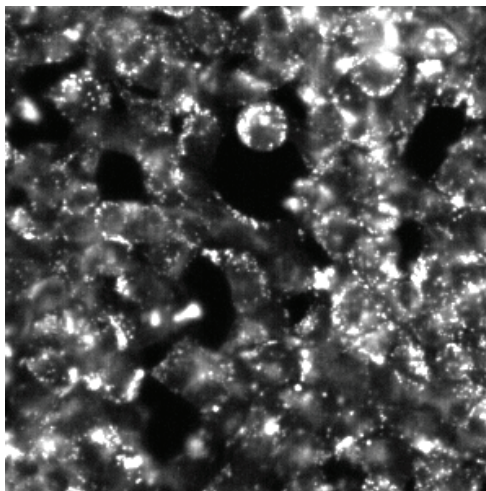

Mitoxanthrone

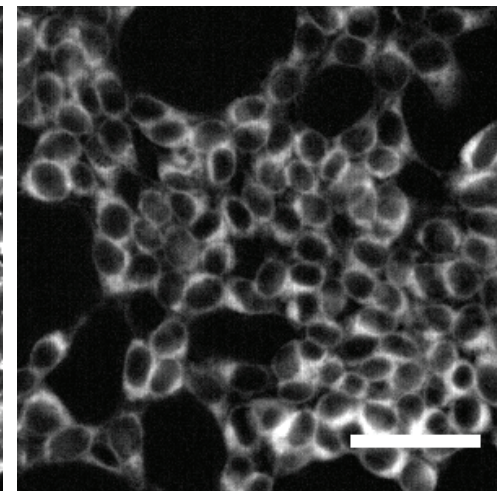

**Fig. S4**

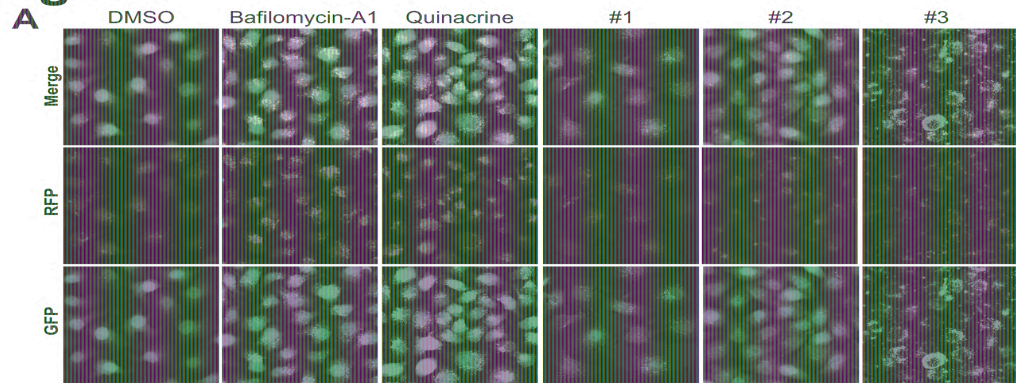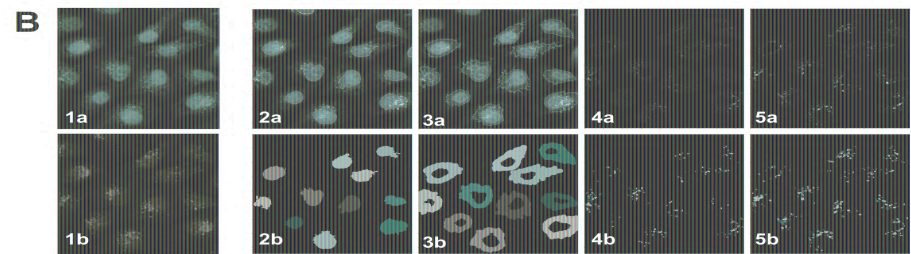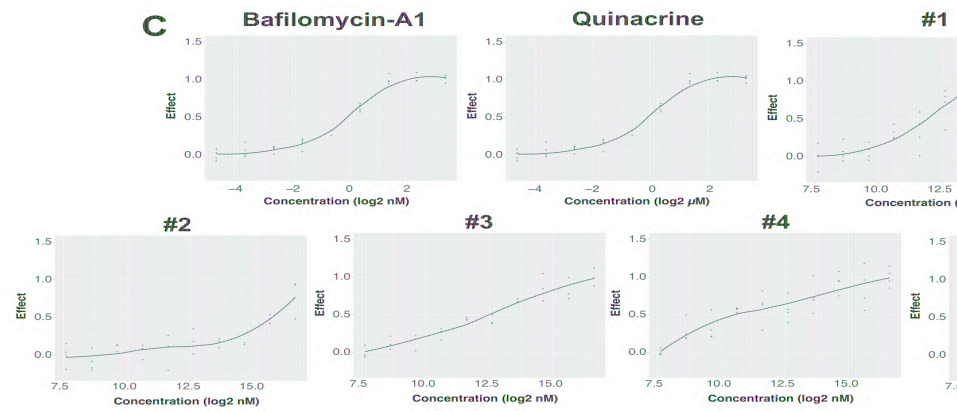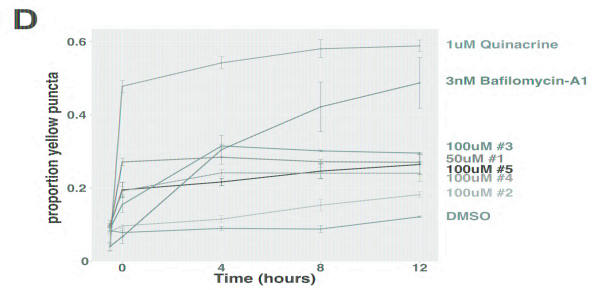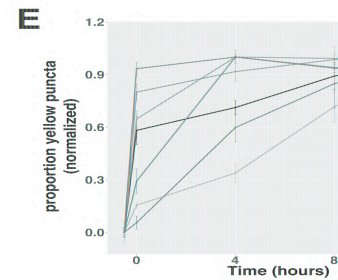

Fig. S5

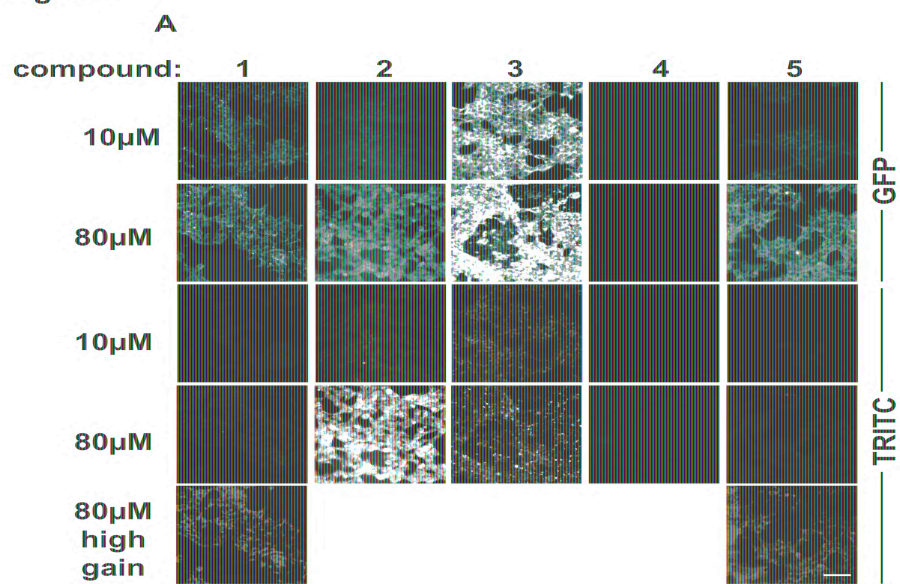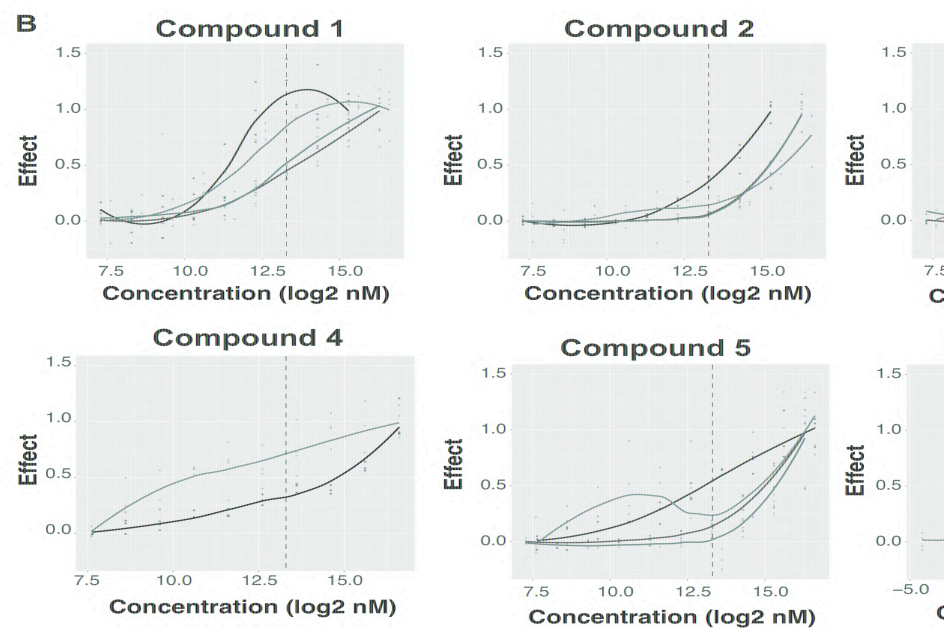

Fig. S6

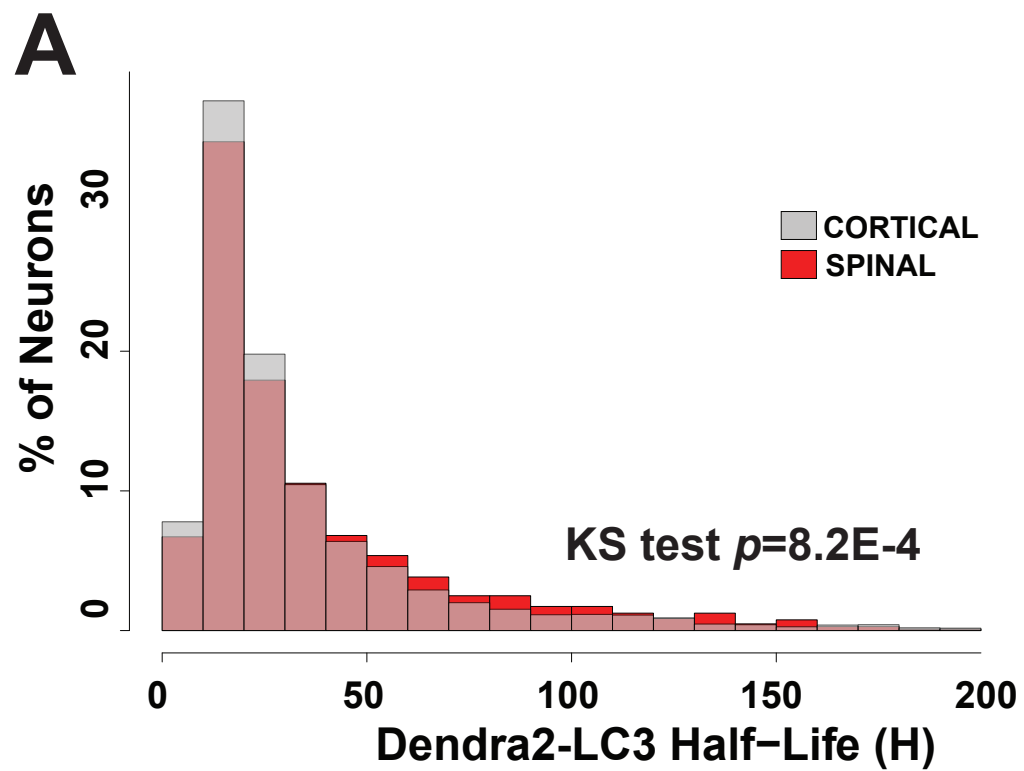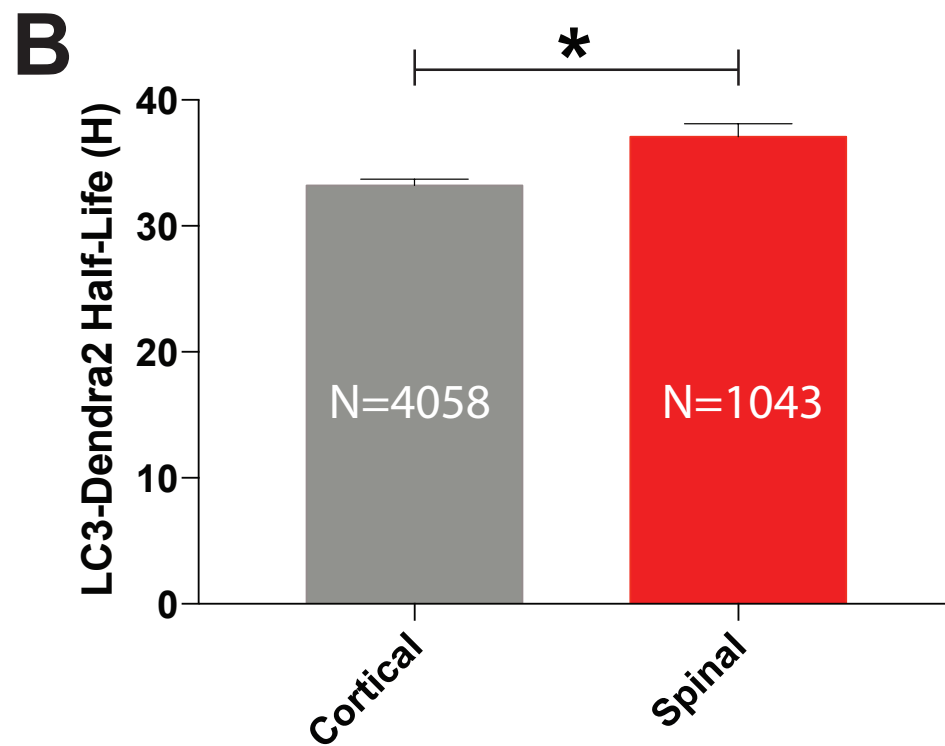





|                                            |            |             |              |              |                 |            |                 |             |      |
|--------------------------------------------|------------|-------------|--------------|--------------|-----------------|------------|-----------------|-------------|------|
| Quinine HCl(2H2O)                          | 0.69512952 | 0.9428517   | 0.076225024  | 1.295505372  | non-significant | 13.0277028 | non-significant | #N/A        | #N/A |
| EX-527                                     | 0.69546196 | 0.943302609 | 0.075623596  | 1.285283626  | non-significant | 14.076725  | non-significant | #N/A        | #N/A |
| MS-275                                     | 0.69650748 | 0.944720718 | 0.073732107  | 1.253136243  | non-significant | 13.7133919 | non-significant | #N/A        | #N/A |
| Deoxycholate?Na                            | 0.69776753 | 0.946429811 | 0.0714525    | 1.214392494  | non-significant | 13.3777872 | non-significant | #N/A        | #N/A |
| UNC0321 (trifluoroacetate salt)            | 0.69812082 | 0.946908997 | 0.070813357  | 1.203529745  | non-significant | 12.7081402 | non-significant | #N/A        | #N/A |
| 1-Naphthoic Acid                           | 0.69833878 | 0.947204633 | 0.070419035  | 1.196827929  | non-significant | 13.5562773 | non-significant | #N/A        | #N/A |
| CPD000466364_IDEBENONE                     | 0.69848838 | 0.947407546 | 0.070148386  | 1.19222804   | non-significant | 15.7112306 | non-significant | #N/A        | #N/A |
| 6-Gingerol                                 | 0.69853882 | 0.947475958 | 0.070057137  | 1.190677192  | non-significant | 13.3581181 | non-significant | #N/A        | #N/A |
| Sinefungin                                 | 0.69931674 | 0.948531109 | 0.068649766  | 1.166757788  | non-significant | 13.5767857 | non-significant | #N/A        | #N/A |
| HNHA                                       | 0.70005412 | 0.949531265 | 0.067315747  | 1.144085075  | non-significant | 13.0524942 | non-significant | #N/A        | #N/A |
| Ascorbic acid                              | 0.70038397 | 0.949978672 | 0.066718991  | 1.133942721  | non-significant | 13.8484586 | non-significant | #N/A        | #N/A |
| JGB1741                                    | 0.70044766 | 0.950065049 | 0.06660378   | 1.13198461   | non-significant | 12.8790914 | non-significant | #N/A        | #N/A |
| Protocatechuic acid                        | 0.70109301 | 0.950940384 | 0.065436249  | 1.112141493  | non-significant | 13.7039536 | non-significant | #N/A        | #N/A |
| NSC 18804                                  | 0.70179442 | 0.95189175  | 0.064167306  | 1.09057479   | non-significant | 12.1779246 | non-significant | #N/A        | #N/A |
| Diludin                                    | 0.70224595 | 0.952504193 | 0.063350424  | 1.07669122   | non-significant | 14.0624813 | non-significant | #N/A        | #N/A |
| CPD000449326_4-Thiazolidinecarboxylic acid | 0.70361788 | 0.954365045 | 0.060868398  | 1.034507209  | non-significant | 13.5338642 | non-significant | #N/A        | #N/A |
| CPD000466276_1H-Imidazol-2-amine, N-       | 0.70437383 | 0.955390382 | 0.059500793  | 1.011263661  | non-significant | 13.2004545 | non-significant | #N/A        | #N/A |
| D-l?-Tocopherylquinone                     | 0.70461042 | 0.955711287 | 0.059072766  | 1.003989002  | non-significant | 14.383259  | non-significant | #N/A        | #N/A |
| MINOXIDIL                                  | 0.70479793 | 0.955955268 | 0.058747343  | 0.998458167  | non-significant | 13.8902216 | non-significant | #N/A        | #N/A |
| NSC 170984                                 | 0.70560369 | 0.957058535 | 0.05725793   | 0.973447997  | non-significant | 13.7215421 | non-significant | #N/A        | #N/A |
| EHNA?HCl                                   | 0.70584303 | 0.957383161 | 0.056842803  | 0.966088991  | non-significant | 13.7230966 | non-significant | #N/A        | #N/A |
| CPD00058212_NICOTINAMIDE                   | 0.70624825 | 0.957932787 | 0.056109706  | 0.953629421  | non-significant | 13.3101562 | non-significant | #N/A        | #N/A |
| Canthaxanthin                              | 0.70671491 | 0.958565759 | 0.05526544   | 0.939280451  | non-significant | 12.6254161 | non-significant | #N/A        | #N/A |
| L-Ergothioneine                            | 0.70706655 | 0.959041276 | 0.054631191  | 0.928500879  | non-significant | 13.5619043 | non-significant | #N/A        | #N/A |
| 2-Deoxyglucose                             | 0.70711867 | 0.959113397 | 0.054534996  | 0.926865957  | non-significant | 13.8085296 | non-significant | #N/A        | #N/A |
| NSC 4972                                   | 0.70775561 | 0.95997732  | 0.053382685  | 0.907281517  | non-significant | 14.6920467 | non-significant | #N/A        | #N/A |
| Licocalcone A                              | 0.70838406 | 0.960829732 | 0.052457529  | 0.887958036  | non-significant | 15.4279024 | non-significant | #N/A        | #N/A |
| Bakuchiol                                  | 0.70908538 | 0.961780983 | 0.05097694   | 0.866393945  | non-significant | 14.106679  | non-significant | #N/A        | #N/A |
| I-BET                                      | 0.70962659 | 0.962515062 | 0.049997817  | 0.849752976  | non-significant | 14.5300526 | non-significant | #N/A        | #N/A |
| PHENETHYL CAFFEATE (CAPE)                  | 0.71007093 | 0.963117745 | 0.049193952  | 0.836090639  | non-significant | 13.3447358 | non-significant | #N/A        | #N/A |
| Dibutyryl cAMP?Na                          | 0.71048586 | 0.963680545 | 0.048443283  | 0.823332424  | non-significant | 15.1235361 | non-significant | #N/A        | #N/A |
| Cl-Amidine                                 | 0.71214363 | 0.965929094 | 0.045444145  | 0.77235966   | non-significant | 13.3279646 | non-significant | #N/A        | #N/A |
| EBSELEN                                    | 0.71257927 | 0.966519982 | 0.044656012  | 0.758964719  | non-significant | 14.1914293 | non-significant | #N/A        | #N/A |
| RETINYL PALMITATE                          | 0.71300411 | 0.967096228 | 0.043887408  | 0.745901679  | non-significant | 14.4117909 | non-significant | #N/A        | #N/A |
| Tetramethylpyrazine                        | 0.71410563 | 0.968590295 | 0.041894606  | 0.7120324    | non-significant | 13.6924222 | non-significant | #N/A        | #N/A |
| DMOG                                       | 0.71455333 | 0.969197541 | 0.041084655  | 0.698266638  | non-significant | 13.8074478 | non-significant | #N/A        | #N/A |
| EUGENOL                                    | 0.71457078 | 0.969221201 | 0.041053097  | 0.697730281  | non-significant | 14.4600912 | non-significant | #N/A        | #N/A |
| Suramin (sodium salt)                      | 0.71458816 | 0.969244774 | 0.041021655  | 0.6971959    | non-significant | 14.4920601 | non-significant | #N/A        | #N/A |
| Pimelic Diphenylamide 106                  | 0.71477383 | 0.969496613 | 0.040685749  | 0.691486904  | non-significant | 12.9250407 | non-significant | #N/A        | #N/A |
| GENTISIC ACID                              | 0.71490771 | 0.969678204 | 0.040443542  | 0.6873704    | non-significant | 12.9765694 | non-significant | #N/A        | #N/A |
| CAPSAICIN                                  | 0.71511771 | 0.969963046 | 0.040063616  | 0.680913263  | non-significant | 15.8027153 | non-significant | #N/A        | #N/A |
| F-Amidine (trifluoroacetate salt)          | 0.71701416 | 0.972535325 | 0.036632682  | 0.622601781  | non-significant | 14.3585486 | non-significant | #N/A        | #N/A |
| MELATONIN                                  | 0.71899951 | 0.975228202 | 0.033040893  | 0.561556463  | non-significant | 13.296126  | non-significant | #N/A        | #N/A |
| Tenovin-1                                  | 0.72013119 | 0.976763166 | 0.030993542  | 0.526760085  | non-significant | 14.1870485 | non-significant | #N/A        | #N/A |
| S-Adenosylhomocysteine                     | 0.72086133 | 0.97775351  | 0.02967261   | 0.504309782  | non-significant | 13.4924455 | non-significant | #N/A        | #N/A |
| D-l?-Tocopherol                            | 0.72095143 | 0.977875719 | 0.029509606  | 0.501539407  | non-significant | 14.2380186 | non-significant | #N/A        | #N/A |
| Anethole trithione                         | 0.72131544 | 0.978369444 | 0.02885107   | 0.490347061  | non-significant | 13.2788198 | non-significant | #N/A        | #N/A |
| Apigenin                                   | 0.72192713 | 0.979199125 | 0.027744434  | 0.471538886  | non-significant | 15.9947006 | non-significant | #N/A        | #N/A |
| CPD000466338_TEMOZOLOMIDE                  | 0.72256178 | 0.980059946 | 0.026596261  | 0.452024769  | non-significant | 13.7405808 | non-significant | #N/A        | #N/A |
| Tocopherol succinate                       | 0.72350181 | 0.981334968 | 0.024895623  | 0.423121064  | non-significant | 15.1103487 | non-significant | #N/A        | #N/A |
| (?-Neplanocin A                            | 0.72369287 | 0.981594114 | 0.024549971  | 0.417246425  | non-significant | 15.0920961 | non-significant | #N/A        | #N/A |
| 8-CPT-cAMP?Na                              | 0.72591605 | 0.984609572 | 0.02052792   | 0.348888457  | non-significant | 13.717633  | non-significant | #N/A        | #N/A |
| CARBAMAZEPINE                              | 0.72662666 | 0.985573416 | 0.019242334  | 0.327038886  | non-significant | 15.4322247 | non-significant | #N/A        | #N/A |
| CAY10603                                   | 0.72810166 | 0.987574069 | 0.016573841  | 0.281685718  | non-significant | 20.7188449 | inhibitor       | #N/A        | #N/A |
| NITRENDIPINE                               | 0.72835712 | 0.987920558 | 0.016111691  | 0.273831108  | non-significant | 13.7014868 | non-significant | #N/A        | #N/A |
| Niguldipine                                | 0.7285959  | 0.98824444  | 0.015679693  | 0.266488945  | non-significant | 14.7454201 | non-significant | #N/A        | #N/A |
| 2',3',5'-triacetyl-5-Azacytidine           | 0.7294329  | 0.989379719 | 0.014165446  | 0.240753114  | non-significant | 13.2754286 | non-significant | #N/A        | #N/A |
| TOLAZAMIDE                                 | 0.73001594 | 0.990170538 | 0.013110643  | 0.222825878  | non-significant | 13.586633  | non-significant | #N/A        | #N/A |
| Splitomicin                                | 0.73179126 | 0.992578516 | 0.009898855  | 0.16823898   | non-significant | 13.9822229 | non-significant | #N/A        | #N/A |
| Rilmidenine                                | 0.73293856 | 0.994134687 | 0.007823218  | 0.132961865  | non-significant | 14.1453568 | non-significant | #N/A        | #N/A |
| ISOLQUIRITIGENIN                           | 0.73322013 | 0.994516591 | 0.00731383   | 0.124304402  | non-significant | 13.6893361 | non-significant | #N/A        | #N/A |
| Ferulic acid ethylester                    | 0.73377835 | 0.995273748 | 0.006303926  | 0.107140274  | non-significant | 14.1609667 | non-significant | #N/A        | #N/A |
| NDGA                                       | 0.735594   | 0.997736439 | 0.003019162  | 0.051313081  | non-significant | 13.2951775 | non-significant | #N/A        | #N/A |
| 3-METHYL-1-PHENYL-2-PYRAZOLIN-5-ONE        | 0.73622825 | 0.998596717 | 0.001871714  | 0.031811284  | non-significant | 13.1101855 | non-significant | #N/A        | #N/A |
| SB-202190                                  | 0.73657807 | 0.999071204 | 0.001238839  | 0.021055057  | non-significant | 15.0528509 | non-significant | #N/A        | #N/A |
| DMSO                                       | 0.73726284 | 1           | NA           | NA           | NA              | 14.1185499 | non-significant | 0.763576208 | NO   |
| L-690,330                                  | 0.73753204 | 1.000365131 | -0.000487015 | -0.008277218 | non-significant | 16.1993273 | non-significant | #N/A        | #N/A |
| Dacinosat                                  | 0.73842541 | 1.001576868 | -0.002103244 | -0.035746311 | non-significant | 17.1974639 | inhibitor       | #N/A        | #N/A |
| Zebularine                                 | 0.7389284  | 1.002259108 | -0.003013223 | -0.051212145 | non-significant | 14.2841895 | non-significant | #N/A        | #N/A |
| CPD000469175_IMATINIB MESYLATE             | 0.73894809 | 1.002285817 | -0.003048847 | -0.051817603 | non-significant | 17.3947537 | inhibitor       | #N/A        | #N/A |
| NSC 62794                                  | 0.74018775 | 1.003967255 | -0.005291567 | -0.089934429 | non-significant | 14.6048426 | non-significant | #N/A        | #N/A |
| Trolox                                     | 0.74019388 | 1.003975567 | -0.005302655 | -0.09012287  | non-significant | 14.0792243 | non-significant | #N/A        | #N/A |
| EPIGALLOCATECHIN-3-MONOGALLATE             | 0.74191426 | 1.006309032 | -0.008415056 | -0.143020615 | non-significant | 15.1981258 | non-significant | #N/A        | #N/A |
| VERAPAMIL HYDROCHLORIDE                    | 0.74216863 | 1.006654052 | -0.008875247 | -0.150841936 | non-significant | 14.7491465 | non-significant | #N/A        | #N/A |
| TEMPOL                                     | 0.74227701 | 1.006801056 | -0.009071323 | -0.154174404 | non-significant | 13.7859052 | non-significant | #N/A        | #N/A |
| Suramin?6Na                                | 0.74418851 | 1.009393755 | -0.012529492 | -0.212948762 | non-significant | 15.017659  | non-significant | #N/A        | #N/A |
| HBEDA?HClA?H2O                             | 0.74451277 | 1.009833578 | -0.013116133 | -0.22291919  | non-significant | 13.811366  | non-significant | #N/A        | #N/A |
| PX105684                                   | 0.74573854 | 1.011496244 | -0.015333815 | -0.260610476 | non-significant | 17.1309648 | inhibitor       | #N/A        | #N/A |
| 2,4-DPD                                    | 0.74745393 | 1.013822872 | -0.018437097 | -0.313353242 | non-significant | 13.6702338 | non-significant | #N/A        | #N/A |
| VALPROATE SODIUM                           | 0.7477982  | 1.014289829 | -0.019059929 | -0.323938772 | non-significant | 13.1617751 | non-significant | #N/A        | #N/A |
| 5147472                                    | 0.74790419 | 1.014433594 | -0.019251685 | -0.327197814 | non-significant | 14.7554661 | non-significant | #N/A        | #N/A |
| Metformin?HCl                              | 0.74813514 | 1.014746845 | -0.019669502 | -0.334298943 | non-significant | 12.6720438 | non-significant | #N/A        | #N/A |
| THIOCTIC ACID                              | 0.74905018 | 1.015987973 | -0.021324932 | -0.362434301 | non-significant | 15.0661687 | non-significant | #N/A        | #N/A |
| Chidamide                                  | 0.74934781 | 1.016391668 | -0.021863385 | -0.371585745 | non-significant | 16.529833  | non-significant | #N/A        | #N/A |
| CDC                                        | 0.75359838 | 1.022157015 | -0.029553267 | -0.502281453 | non-significant | 14.9593311 | non-significant | #N/A        | #N/A |

|                                      |            |             |              |              |                 |            |                 |             |      |
|--------------------------------------|------------|-------------|--------------|--------------|-----------------|------------|-----------------|-------------|------|
| 3-Deazaneplanocin A                  | 0.75381872 | 1.022455865 | -0.029951876 | -0.509056142 | non-significant | 15.300576  | non-significant | #N/A        | #N/A |
| Scriptaid                            | 0.75599961 | 1.025413962 | -0.033897419 | -0.576113804 | non-significant | 20.230442  | inhibitor       | #N/A        | #N/A |
| GENISTEIN                            | 0.7570347  | 1.026817921 | -0.035770034 | -0.607940391 | non-significant | 13.7567165 | non-significant | #N/A        | #N/A |
| Seratrodast                          | 0.75850285 | 1.028809278 | -0.038426129 | -0.65308285  | non-significant | 12.7799624 | non-significant | #N/A        | #N/A |
| 4-iodo-SAHA                          | 0.76008636 | 1.030957099 | -0.041290916 | -0.7017722   | non-significant | 16.2404314 | non-significant | #N/A        | #N/A |
| NSC 401077                           | 0.76032395 | 1.031279361 | -0.041720752 | -0.70907761  | non-significant | 13.008035  | non-significant | #N/A        | #N/A |
| NVP-LBH589                           | 0.76161097 | 1.033025026 | -0.044049139 | -0.74865042  | non-significant | 18.7133963 | inhibitor       | #N/A        | #N/A |
| CAFFEINE                             | 0.76509427 | 1.037749664 | -0.050350912 | -0.855754107 | non-significant | 14.1991437 | non-significant | #N/A        | #N/A |
| Trichostatin A                       | 0.76618214 | 1.039225222 | -0.052319027 | -0.889203797 | non-significant | 18.5364429 | inhibitor       | #N/A        | #N/A |
| HYDROQUINONE                         | 0.76692274 | 1.040229743 | -0.053658868 | -0.911975461 | non-significant | 13.0605182 | non-significant | #N/A        | #N/A |
| NIMODIPINE                           | 0.76823131 | 1.042004648 | -0.056026256 | -0.952211115 | non-significant | 14.0669637 | non-significant | #N/A        | #N/A |
| LY 294002                            | 0.77558726 | 1.051982032 | -0.069334199 | -1.178390271 | non-significant | 13.7020925 | non-significant | #N/A        | #N/A |
| Hydroxychloroquine                   | 0.77717596 | 1.054136897 | -0.072208381 | -1.227239308 | non-significant | 14.0450336 | non-significant | #N/A        | #N/A |
| ETYA                                 | 0.77964957 | 1.057492019 | -0.076683479 | -1.303297181 | non-significant | 15.0260388 | non-significant | #N/A        | #N/A |
| CBHA                                 | 0.79275085 | 1.075262178 | -0.100385511 | -1.706132206 | non-significant | 20.8654275 | inhibitor       | #N/A        | #N/A |
| ETHOXQUIN                            | 0.79663177 | 1.080526141 | -0.107406642 | -1.825461958 | non-significant | 14.5066695 | non-significant | #N/A        | #N/A |
| NSC 26326                            | 0.80297134 | 1.089124925 | -0.118875794 | -2.020389384 | non-significant | 15.1105917 | non-significant | #N/A        | #N/A |
| SAHA                                 | 0.8036859  | 1.090094133 | -0.120168534 | -2.042360538 | non-significant | 20.3880498 | inhibitor       | #N/A        | #N/A |
| n-Octyl caffeate                     | 0.80578661 | 1.092943473 | -0.123969014 | -2.106952745 | non-significant | 16.9668871 | inhibitor       | #N/A        | #N/A |
| AGK2                                 | 0.81345014 | 1.103338048 | -0.137833412 | -2.342589295 | non-significant | 16.3257095 | non-significant | #N/A        | #N/A |
| CYCLOHEXIMIDE                        | 0.84299465 | 1.143411287 | -0.191283533 | -3.251016934 | inhibitor       | 18.8695629 | inhibitor       | 0.826837469 | NO   |
| U74389G maleate                      | 0.86352956 | 1.171264187 | -0.228434033 | -3.88241946  | inhibitor       | 16.4015569 | non-significant | 0.926349295 | YES  |
| Tubastatin A (trifluoroacetate salt) | 0.87325607 | 1.184456911 | -0.246030633 | -4.181487775 | inhibitor       | 20.3912902 | inhibitor       | 0.798336888 | NO   |
| ALLN                                 | 0.88442532 | 1.199606531 | -0.26623736  | -4.524917304 | inhibitor       | 28.3709302 | inhibitor       | 0.857586629 | NO   |
| MG132                                | 0.91965387 | 1.247389418 | -0.329970694 | -5.608116384 | inhibitor       | 49.5576448 | inhibitor       | 0.789265    | NO   |
| Curcumin                             | 0.97726982 | 1.32553788  | -0.434205961 | -7.379678291 | inhibitor       | 16.6637492 | non-significant | 2.697478274 | YES  |
| NICLOSAMIDE                          | 1.10130446 | 1.493774533 | -0.658601837 | -11.19346604 | inhibitor       | -49.302226 | inhibitor       | 0.675069842 | NO   |
| Bafilomycin A1                       | 1.21508581 | 1.648103969 | -0.864448116 | -14.69198851 | inhibitor       | 106.214287 | inhibitor       | 0.865698976 | NO   |
| CPD000469152_TERBINAFINE HCl         | 1.42060712 | 1.926866562 | -1.236264691 | -21.01130918 | inhibitor       | -20.11502  | inhibitor       | 0.759322914 | NO   |
| GF 109203X                           | 3.41064939 | 4.62609697  | -4.836527537 | -82.20066154 | inhibitor       | -40.013818 | inhibitor       | 10.40788771 | YES  |



|                                    |            |                  |              |         |              |                  |                 |         |     |               |             |
|------------------------------------|------------|------------------|--------------|---------|--------------|------------------|-----------------|---------|-----|---------------|-------------|
| LOVASTATIN                         | -0.5262054 | inhibitor        | -3.739785549 | 0.69939 | -1.234096598 | 0.009119661      | non-significant | plate 2 | 103 | #N/A          | #N/A        |
| Dinoprost trometamol               | -0.4602376 | inhibitor        | -3.270947516 | 0.6996  | 0.618663797  | 0.008638988      | non-significant | plate 1 | 104 | #N/A          | #N/A        |
| Atorvastatin                       | -0.2042638 | inhibitor        | -3.361097864 | 0.70119 | -1.329020137 | 0.007061163      | non-significant | plate 2 | 105 | #N/A          | #N/A        |
| SULCONAZOLE NITRATE                | 0.5005188  | enhancer         | 6.823990351  | 0.7015  | -1.345210792 | 0.005644672      | non-significant | plate 2 | 106 | #N/A          | #N/A        |
| SULFAMETER                         | 0.40672644 | enhancer         | 5.54524086   | 0.70257 | 0.551422953  | 0.008216233      | non-significant | plate 1 | 107 | #N/A          | #N/A        |
| DO 897/99                          | -0.4865664 | inhibitor        | -3.458068531 | 0.7039  | -1.471513704 | 0.006413292      | non-significant | plate 2 | 108 | #N/A          | #N/A        |
| OXICONAZOLE NITRATE                | 0.51386189 | enhancer         | 7.00590784   | 0.70466 | -1.511580608 | 0.008578999      | non-significant | plate 2 | 109 | #N/A          | #N/A        |
| Etoricoxib                         | -0.5956954 | inhibitor        | -4.233657404 | 0.70469 | 0.503599328  | 0.020796188      | non-significant | plate 1 | 110 | 0.726130427   | #N/A        |
| PROPARACAINE HYDROCHLORIDE         | 0.46583228 | enhancer         | 6.351080169  | 0.70655 | 0.461385483  | 0.010145724      | non-significant | plate 1 | 111 | #N/A          | #N/A        |
| Estramustine                       | 0.45171892 | enhancer         | 7.432893826  | 0.70711 | -1.6407886   | 0.009831745      | non-significant | plate 2 | 112 | #N/A          | #N/A        |
| NAFTIFINE HYDROCHLORIDE            | 0.21016172 | enhancer         | 3.458145536  | 0.70755 | 0.438886633  | 0.043722179      | non-significant | plate 1 | 113 | #N/A          | #N/A        |
| Gestrinone                         | -0.2598281 | inhibitor        | -4.275390281 | 0.70759 | -1.665919394 | 0.01395934       | non-significant | plate 2 | 114 | #N/A          | #N/A        |
| CPD000336944 mevastatin            | -0.4510806 | inhibitor        | -3.205867895 | 0.71014 | -1.800045968 | 0.004180073      | non-significant | plate 2 | 115 | #N/A          | #N/A        |
| Tyloxapol                          | 0.42839157 | enhancer         | 5.840619681  | 0.71024 | -1.805697914 | 0.007311768      | non-significant | plate 2 | 116 | #N/A          | #N/A        |
| HEXACHLOROPHENE                    | 0.67843993 | enhancer         | 11.16351732  | 0.71162 | -1.878132333 | 0.009325885      | non-significant | plate 2 | 118 | #N/A          | #N/A        |
| Amphotericin B                     | -0.5038243 | inhibitor        | -3.580721237 | 0.71165 | 0.345873361  | 0.012610234      | non-significant | plate 1 | 119 | 0.706443472   | #N/A        |
| MEBENDAZOLE                        | 0.37593186 | enhancer         | 3.912539619  | 0.71488 | -2.049803369 | 0.004454286      | non-significant | plate 2 | 120 | #N/A          | #N/A        |
| DILOXANIDE FUROATE                 | 0.23836408 | enhancer         | 3.249816349  | 0.71754 | 0.212573974  | 0.022902366      | non-significant | plate 1 | 121 | #N/A          | #N/A        |
| CHLORTETRACYCLINE HYDROCHLORIDE    | 0.46579662 | enhancer         | 4.847814096  | 0.71768 | 0.209452285  | 0.019309703      | non-significant | plate 1 | 122 | #N/A          | #N/A        |
| PRAZOSIN HYDROCHLORIDE             | -0.2837255 | inhibitor        | -3.868266743 | 0.71855 | -2.243398148 | 0.008318949      | non-significant | plate 2 | 123 | #N/A          | #N/A        |
| TRICLOSAN                          | 0.57623554 | enhancer         | 9.481775926  | 0.7209  | -2.366996431 | 0.01784983       | non-significant | plate 2 | 124 | #N/A          | #N/A        |
| AMOROLFINE HYDROCHLORIDE           | 0.45026197 | enhancer         | 7.408920167  | 0.72105 | -2.374978195 | 0.026561846      | non-significant | plate 2 | 125 | #N/A          | #N/A        |
| Bromocryptine mesylate             | 0.41298894 | enhancer         | 4.298214103  | 0.72336 | 0.080958069  | 0.024958997      | non-significant | plate 1 | 126 | #N/A          | #N/A        |
| Avermectin B1a                     | 0.36715902 | enhancer         | 5.00578527   | 0.72552 | -2.610317469 | 0.01880213       | non-significant | plate 2 | 127 | #N/A          | #N/A        |
| DMSO                               | #N/A       | non-significant  | #N/A         | 0.72569 | 0.020882996  | 0.004960111      | non-significant | plate 1 | 128 | 0.675069842   | NO          |
| DILAZEP DIHYDROCHLORIDE            | -0.5391178 | inhibitor        | -5.610909504 | 0.73351 | -0.14892721  | 0.01791535       | non-significant | plate 1 | 129 | #N/A          | #N/A        |
| Ivermectin                         | 0.31826256 | enhancer         | 3.31234195   | 0.7349  | -3.104485911 | 0.008257464      | inhibitor       | plate 2 | 130 | #N/A          | NO          |
| Haloproglin                        | 0.55120193 | enhancer         | 3.917438312  | 0.73786 | -3.260059023 | 0.01481143       | inhibitor       | plate 2 | 131 | #N/A          | NO          |
| Estropipate                        | 0.29819842 | enhancer         | 4.06558783   | 0.73851 | -0.262091035 | 0.020159141      | non-significant | plate 1 | 132 | #N/A          | #N/A        |
| Alfacalcidol                       | 0.44851495 | enhancer         | 3.187633392  | 0.75281 | -4.047774907 | 0.009385267      | inhibitor       | plate 2 | 133 | #N/A          | NO          |
| Clinidipine                        | 0.28226936 | enhancer         | 4.644654177  | 0.7576  | -4.299936095 | 0.011337818      | inhibitor       | plate 2 | 134 | #N/A          | NO          |
| CYCLOHEXIMIDE                      | 0.63325095 | enhancer         | 8.633638512  | 0.84598 | -2.694714613 | 0.028425129      | non-significant | plate 1 | 135 | Cyclohexamide | #N/A        |
| Quinacrine dihydrochloride hydrate | -2.1091858 | inhibitor puncta | -21.95151267 | 0.85718 | -2.948365052 | 0 n=1 due to art | non-significant | plate 1 | 136 | Quinacrine    | 0.723005469 |
| DIACERIN                           | 0.29801344 | enhancer         | 4.063065895  | 0.92739 | -4.537680299 | 0.074528679      | inhibitor       | plate 1 | 137 | Diacerin      | #N/A        |
| Nicosamide                         | 0.27756754 | enhancer         | 3.099866314  | 1.10624 | -22.66078712 | 0.026593144      | inhibitor       | plate 2 | 137 | Nicosamide    | #N/A        |
